# Supplementary material for: Controlled aggregation of Pt/PtH/Rh/RhH doped silver superatomic nanoclusters into 16-electron supermolecules
Source: Royal Society of Chemistry journal article supplement (doi:10.1039/d4sc02920h), 2024-01-01
Supplement: d4sc02920h1.pdf [file d4sc02920h1.pdf]

## Supplementary Information

### Controlled Aggregation of Pt/PtH/Rh/RhH doped Silver Superatomic Nanoclusters into 16-electron Supermolecules

Tzu-Hao Chiu,<sup>a</sup> Michael N. Pillay,<sup>a</sup> Ying-Yann Wu,<sup>a</sup> Yoshiki Niihori,<sup>b</sup> Yuichi Negishi,<sup>b</sup> Jie-Ying Chen,<sup>c</sup> Yuan Jang Chen,<sup>c</sup> Samia Kahlal,<sup>d</sup> Jean-Yves Saillard,<sup>d\*</sup> and C. W. Liu<sup>a\*</sup>

- a. Department of Chemistry, National Dong Hwa University, Hualien 97401, Taiwan (Republic of China).
- b. Department of Applied Chemistry, Tokyo University of Science, 1-3 Kagurazaka, Shinjuku, Tokyo 162-8601, Japan.
- c. Department of Chemistry, Fu Jen Catholic University, New Taipei City, 24205, Taiwan (Republic of China).
- d. Univ Rennes, CNRS, ISCR-UMR 6226, F-35000 Rennes, France. \* Correspondence: E-mail: chenwei@mail.ndhu.edu.tw; Tel: +886-3-890-3607; Fax : +886-3-890-0162; <http://faculty.ndhu.edu.tw/~cwl/index.htm>

### Experimental Section

#### 1.1 General remarks

All chemicals were purchased from commercial sources and used as received. Solvents were purified following standard protocols. All reactions were carried out under N<sub>2</sub> atmosphere by using standard Schlenk techniques. [Ag(CH<sub>3</sub>CN)<sub>4</sub>]PF<sub>6</sub> and NH<sub>4</sub>[S<sub>2</sub>P(O<sup>n</sup>Pr)<sub>2</sub>] were prepared by following the procedure reported in literature.<sup>S1,S2</sup> NMR spectra were recorded on a Bruker AVII-400 and AV-600 MHz NMR spectrometers. The chemical shift (δ) is reported in ppm and Hz, respectively. ESI-mass spectra recorded on a Bruker maXis Q-TOF mass spectrometer (Bruker Daltonik GmbH, Germany). UV-visible-NIR absorption spectra were measured on a Shimadzu UV3101PC spectrophotometer at 298 K, using quartz cells with a path length of 1 cm. Luminescence spectra and lifetime were recorded on an Edinburgh FLS920 fluorescence spectrometer. PLQY study was conducted on a HORIBA JOBIN YVON iHR 550 spectrometer, equipped with a HORIBA Symphony InGaAs-1700 (for the NIR) detector head mounted on the exit port. [Ru(bpy)<sub>2</sub>(en)]<sup>2+</sup> (bpy = bipyridine; en = ethylenediamine) was the reference for the determination at 87 K.

## 1.2 Synthesis

### 1.2.1 Synthesis of [(RhH)<sub>2</sub>Ag<sub>33</sub>{S<sub>2</sub>P(O<sup>n</sup>Pr)<sub>2</sub>}]<sub>17</sub> (**1**)

In a Flame-dried Schlenk tube, [Ag(CH<sub>3</sub>CN)<sub>4</sub>]PF<sub>6</sub> (0.50 g, 0.86 mmol) and NH<sub>4</sub>[S<sub>2</sub>P(O<sup>n</sup>Pr)<sub>2</sub>] (0.14 g, 0.43 mmol) were dissolved in THF, and kept stirring at -20 °C for 5 minutes. [Rh(COD)Cl]<sub>2</sub> (0.02 g, 0.043 mmol) was added to the above solution. After 10 minutes, NaBH<sub>4</sub> (0.02 g, 0.86 mmol) was added, and kept stirring for 12 hours. The reaction mixture was dried under reduced pressure. The residue was washed with DCM/DI-Water. The DCM layer was dried under reduced pressure and subsequently purified by thin-layer chromatography, with MeOH as a mobile phase. Finally, a gray-black product can be obtained. The yield of **1** is 10% based on Ag.

#### [(RhH)<sub>2</sub>Ag<sub>33</sub>{S<sub>2</sub>P(O<sup>n</sup>Pr)<sub>2</sub>}]<sub>17</sub> (**1**)

<sup>31</sup>P{<sup>1</sup>H} NMR (161.97 MHz, CDCl<sub>3</sub>, δ, ppm, r.t.): 104.7 (br, 10 S<sub>2</sub>P), 101.0 (s, 2 S<sub>2</sub>P), 96.9 (br, 5 S<sub>2</sub>P). <sup>1</sup>H NMR (400 MHz, CDCl<sub>3</sub>, δ, ppm, r.t.): -12.1 (br, μ<sub>4</sub>-H, 2H) 0.9-1.0 (m, CH<sub>3</sub>, 102H), 1.67-1.89 (m, CH<sub>2</sub>, 68H), 3.97 (q, OCH<sub>2</sub>, 8H), 4.12 (q, OCH<sub>2</sub>, 40H), 4.34 (q, OCH<sub>2</sub>, 20H). ESI-MS (*m/z*): exp. 7392.983 (calc. for [M + H]<sup>+</sup>: 7392.990). UV-vis [λ<sub>max</sub> in nm, (ε in M<sup>-1</sup>cm<sup>-1</sup>): 380 (65500), 500 (35500), 708 (6000).

### 1.2.1 Synthesis of [PtHPtAg<sub>32</sub>{S<sub>2</sub>P(O<sup>n</sup>Pr)<sub>2</sub>}]<sub>17</sub> (**2**) and [Pt<sub>2</sub>Ag<sub>33</sub>{S<sub>2</sub>P(O<sup>n</sup>Pr)<sub>2</sub>}]<sub>17</sub> (**3**)

In a Flame-dried Schlenk tube, [Ag(CH<sub>3</sub>CN)<sub>4</sub>]PF<sub>6</sub> (0.50 g, 0.86 mmol) and NH<sub>4</sub>[S<sub>2</sub>P(O<sup>n</sup>Pr)<sub>2</sub>] (0.14 g, 0.43 mmol) were dissolved in THF, and kept stirring at -20 °C for 5 minutes. Pt[S<sub>2</sub>P(O<sup>n</sup>Pr)<sub>2</sub>]<sub>2</sub> (0.02 g, 0.043 mmol) was added to the above solution. After 10 minutes, NaBH<sub>4</sub> (0.02 g, 0.86 mmol) was added, and kept stirring for 12 hours. The reaction mixture was dried under reduced pressure. The residue was washed with DCM/DI-Water. The DCM layer was dried under reduced pressure and further purified by thin-layer chromatography with MeOH as a mobile phase. The first brown band is [PtAg<sub>20</sub>{S<sub>2</sub>P(O<sup>n</sup>Pr)<sub>2</sub>}]<sub>12</sub>. The second purple band is [PtHPtAg<sub>32</sub>{S<sub>2</sub>P(O<sup>n</sup>Pr)<sub>2</sub>}]<sub>17</sub> (**2**). The final purple band is [Pt<sub>2</sub>Ag<sub>33</sub>{S<sub>2</sub>P(O<sup>n</sup>Pr)<sub>2</sub>}]<sub>17</sub> (**3**) (Figure S22). The yields of **2**, and **3** are 2% and 11%, respectively, based on Ag.

#### [PtHPtAg<sub>32</sub>{S<sub>2</sub>P(O<sup>n</sup>Pr)<sub>2</sub>}]<sub>17</sub> (**2**)

<sup>31</sup>P{<sup>1</sup>H} NMR (161.97 MHz, CDCl<sub>3</sub>, δ, ppm, r.t.): 106.0 (br, 5 S<sub>2</sub>P), 104.8 (br, 5 S<sub>2</sub>P), 101.0 (s, 2 S<sub>2</sub>P), 96.2 (br, 5 S<sub>2</sub>P). <sup>1</sup>H NMR (400 MHz, CDCl<sub>3</sub>, δ, ppm, r.t.): -10.4 (br, <sup>1</sup>J<sub>H-195Pt</sub> = 512 Hz at 293K) 0.9-1.0 (m, CH<sub>3</sub>, 102H), 1.63-1.87 (m, CH<sub>2</sub>, 68H), 3.99 (q, OCH<sub>2</sub>, 8H), 4.12 (q, OCH<sub>2</sub>, 40H), 4.31 (q, OCH<sub>2</sub>, 20H). ESI-MS (*m/z*): exp. 3841.954 (calc. for [M + 2Ag]<sup>2+</sup>: 3841.987). UV-vis [λ<sub>max</sub> in nm, (ε in M<sup>-1</sup>cm<sup>-1</sup>): 490 (26000), 700 (4000).

### 1.3 X-ray crystallography

Single crystals suitable for X-ray diffraction analysis of **1**, **2**, and **3** was obtained by evaporating MeOH solution at 4°C within a week. The single crystals were mounted on the tip of glass fiber coated in paratone oil, then frozen. Data were collected on a Bruker APEX II CCD diffractometer using graphite monochromated Mo  $K\alpha$  radiation ( $\lambda = 0.71073 \text{ \AA}$ ) at 100 K. Absorption corrections for area detector were performed with SADABS<sup>S3</sup> and the integration of raw data frame was performed with SAINT.<sup>S4</sup> The structure was solved by direct methods and refined by least-squares against  $F^2$  using the SHELXL-2018/3 package,<sup>S5,S6</sup> incorporated in SHELXTL/PC V6.14.<sup>S7</sup> All non-hydrogen atoms were refined anisotropically. CCDC 2342395 (**1**), 2342396 (**2**) and 2342397 (**3**) contains the supplementary crystallographic data for compounds **1-3** in this article. These data can be obtained free of charge from the Cambridge Crystallographic Data Centre via [www.ccdc.cam.ac.uk/data\\_request/cif](http://www.ccdc.cam.ac.uk/data_request/cif).

### 1.4 Computational Details

Geometry optimizations were performed by density functional theory (DFT) calculations with the Gaussian 16 package,<sup>s8</sup> using the BP86 functional<sup>s9</sup> and the all-electron Def2-TZVP set from EMSL Basis Set Exchange Library.<sup>s10</sup> All the optimized geometries were characterized as true minima by vibrational analysis. The NAO charges and Wiberg bond indices were computed with the NBO 6.0 program<sup>s11</sup> on single-point calculations performed with the BP86 functional and the Def2-SVP basis set for computational limitations.<sup>s12</sup> The UV-visible transitions were calculated by means of time-dependent DFT (TD-DFT) calculations, with the CAM-B3LYP functional<sup>s13</sup> and the Def2-TZVP basis set. Only singlet-singlet, *i.e.* spin-allowed, transitions have been computed. The UV-visible spectra were simulated from the computed TD-DFT transitions and their oscillator strengths by using the Multiwfn program,<sup>s14</sup> each transition is associated with a Gaussian function of half-height width equal to  $2000 \text{ cm}^{-1}$ . The compositions of the molecular orbitals were calculated using the AOMix program.<sup>s15</sup>

## References

- S1. A. A. M. Alyl, B. Walfortn, H. Z. Lang, *Kristallogr. NCS* **2004**, *219*, 489-491.
- S2. P. Wystrach, E. O. Hook, G. L. M. Christopher, *J. Org. Chem.* **1956**, *21*, 705-705.
- S3. SADABS, version 2014-11.0, Bruker Area Detector Absorption Correxions (Bruker AXS Inc., Madison, WI, 2014).
- S4. SAINT, included in G. Jogl, V4.043: Software for the CCD detector system (Bruker Analytical: Madison, WI, 1995).
- S5. G. M. Sheldrick, *Acta Cryst. A* **2008**, *64*, 112-122.
- S6. T. Gruene, H. W. Hahn, A. V. Luebben, F. Meilleur, G. M. J. Sheldrick, *Appl. Cryst.* **2014**, *47*, 462-466.
- S7. SHELXTL, version 6.14. (Bruker AXS Inc., Madison, Wisconsin, USA, 2003).
- S8. M. J. Frisch, G. W. Trucks, H. B. Schlegel, G. E. Scuseria, M. A. Robb, J. R. Cheeseman, G. Scalmani, V. Barone, G. A. Petersson, H. Nakatsuji, X. Li, M. Caricato, A. V. Marenich, J. Bloino, B. G. Janesko, R. Gomperts, B. Mennucci, H. P. Hratchian, J. V. Ortiz, A. F. Izmaylov, J. L. Sonnenberg, D. Williams-Young, F. Ding, F. Lipparini, F. Egidi, J. Goings, B. Peng, A. Petrone, T. Henderson, D. Ranasinghe, V. G. Zakrzewski, J. Gao, N. Rega, G. Zheng, W. Liang, M. Hada, M. Ehara, K. Toyota, R. Fukuda, J. Hasegawa, M. Ishida, T. Nakajima, Y. Honda, O. Kitao, H. Nakai, T. Vreven, K. Throssell, Jr. J. A. Montgomery, J. E. Peralta, F. Ogliaro, M. J. Bearpark, J. J. Heyd, E. N. Brothers, K. N. Kudin, V. N. Staroverov, T. A. Keith, R. Kobayashi, J. Normand, K. Raghavachari, A. P. Rendell, J. C. Burant, S. S. Iyengar, J. Tomasi, M. Cossi, J. M. Millam, M. Klene, C. Adamo, R. Cammi, J. W. Ochterski, R. L. Martin, K. Morokuma, O. Farkas, J. B. Foresman, D. J. Fox, Gaussian, Inc., Wallingford CT, **2016**; Gaussian 16, Revision A.03.
- S9. a) A. D. Becke, *Phys. Rev. A*, **1988**, *38*, 3098-3100; b) J. P. Perdew, *Phys. Rev. B*, **1986**, *33*, 8822-8824.

- S10. a) A. Schaefer, H. Horn, R. Ahlrichs, *J. Chem. Phys.* **1992**, *97*, 2571-2577; b) A. Schaefer, C. Huber, R. Ahlrichs, *J. Chem. Phys.* **1994**, *100*, 5829-5835.
- S11. a) E. D. Glendening, C. R. Landis, F. Weinhold, *J. Comput. Chem.*, **2013**, *34*, 1429–1437. b) E. D. Glendening, J. K. Badenhop, A. E. Reed, J. E. Carpenter, J. A. Bohmann, C. M. Morales, C. R. Landis, F. Weinhold, *NBO 6.0*; Theoretical Chemistry Institute, University of Wisconsin, Madison, WI, **2013**, <http://nbo6.chem.wisc.edu>.
- S12. a) F. Weigend, R. Ahlrichs, *Phys. Chem. Chem. Phys.* **2005**, *7*, 3297-3305; b) F. Weigend, *Phys. Chem. Chem. Phys.* **2006**, *8*, 1057-1065.
- S13. T. Yanai, D. Tew, N. Handy, *Chem. Phys. Lett.* **2004**, *393*, 51-57.
- S14. T. Liu, F. Chen, *J. Comput. Chem.* **2012**, *33*, 580–592.
- S15. Gorelsky, S. I. AOMix program, <http://www.sg-chem.net>.

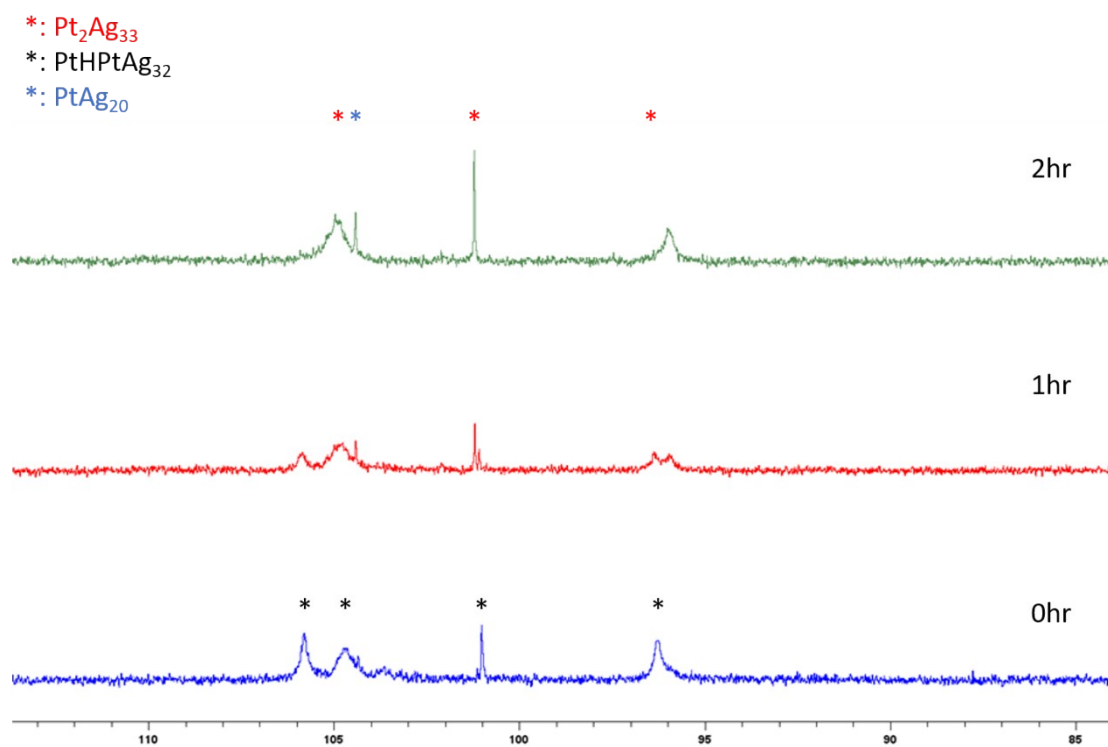

**Figure S1.** Time-dependent  $^{31}\text{P}$  NMR spectra ( $\text{CDCl}_3$ ) of **2** under  $60^\circ\text{C}$ .

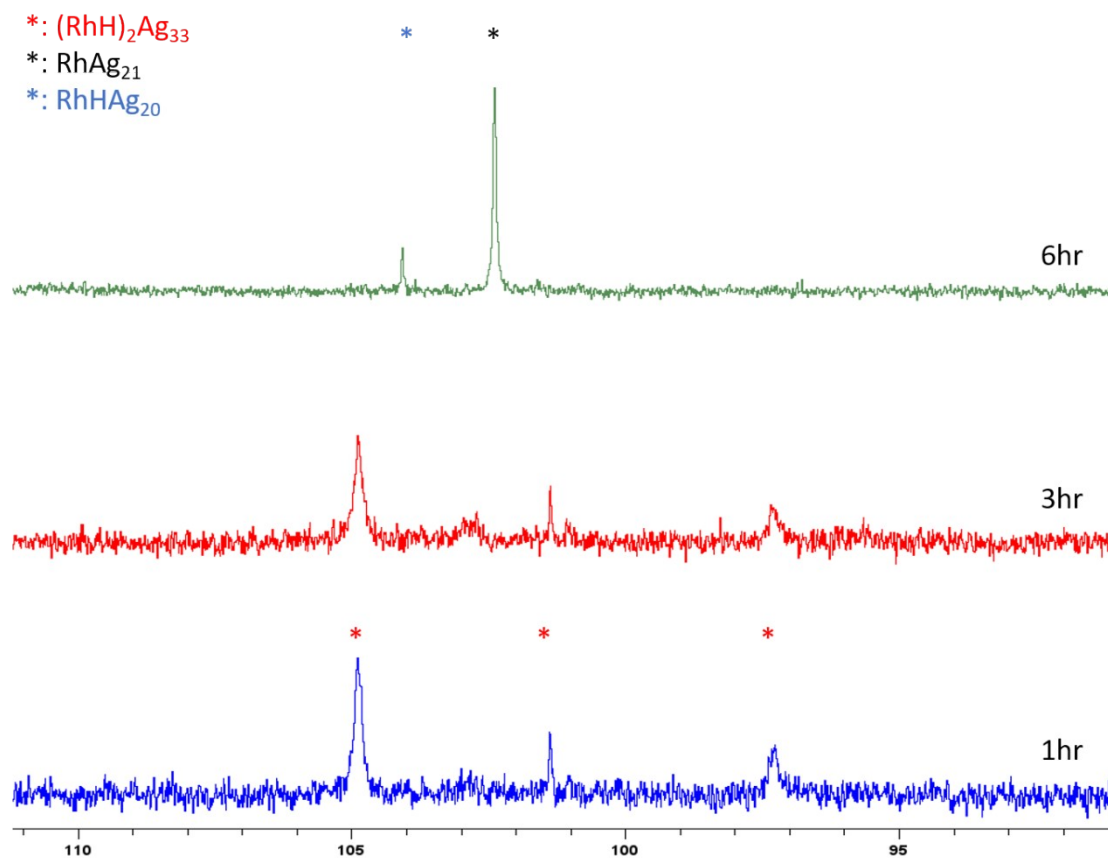

**Figure S2.** Time-dependent  $^{31}\text{P}$  NMR spectra ( $\text{CDCl}_3$ ) of **1** under  $60^\circ\text{C}$ .

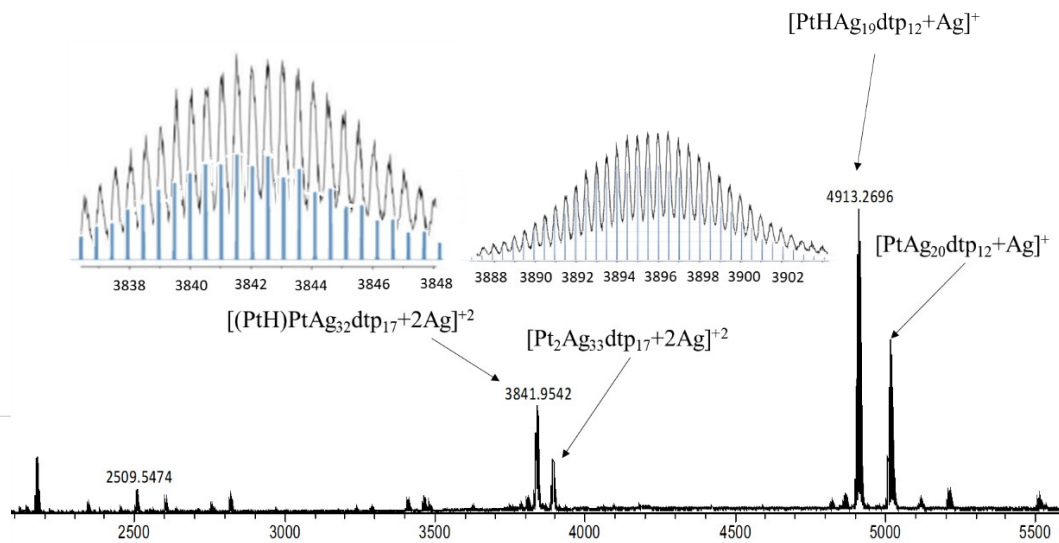

**Figure S3.** Positive-mode ESI mass spectrum of 2. Insets: experimental (black) and simulated (blue).

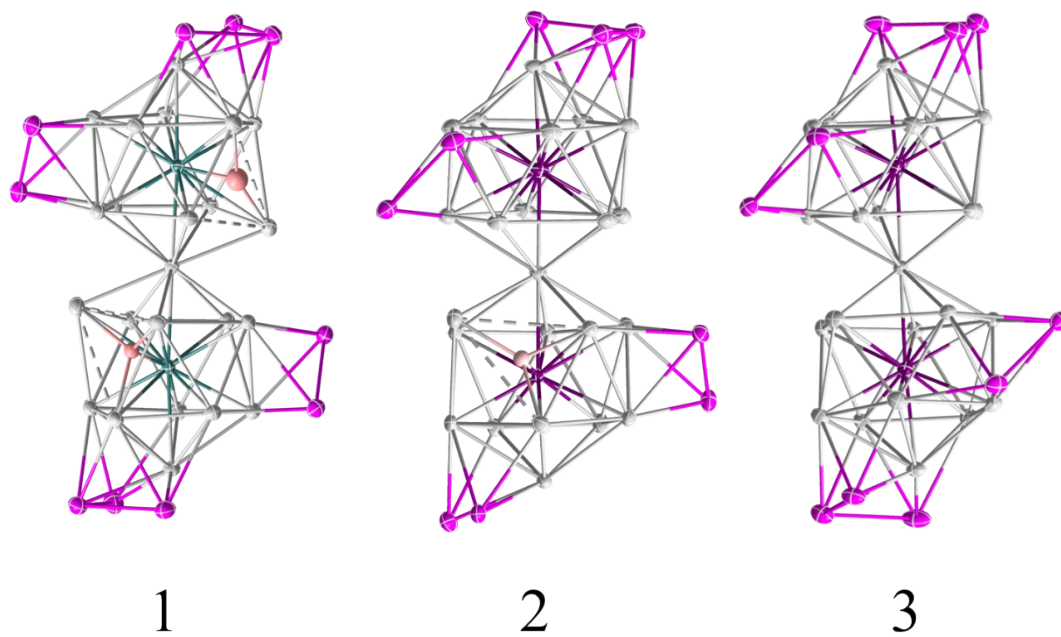

**Figure S4.** Metal framework of 1-3.

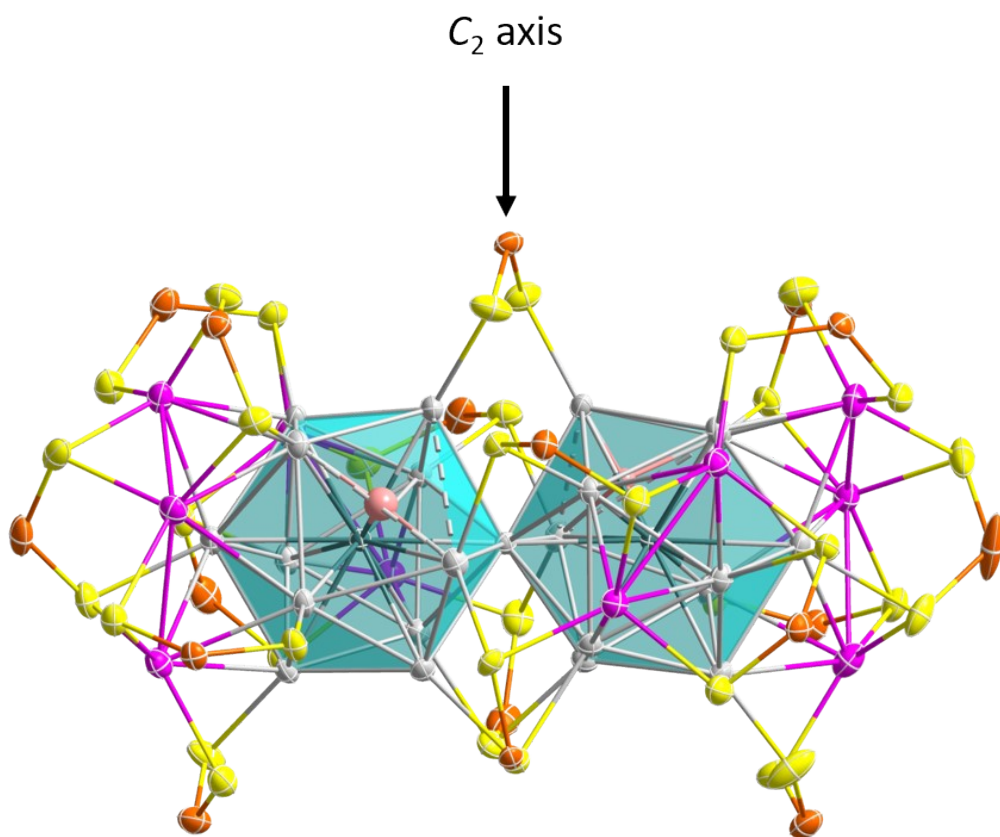

**Figure S5.** Side view of **1**.



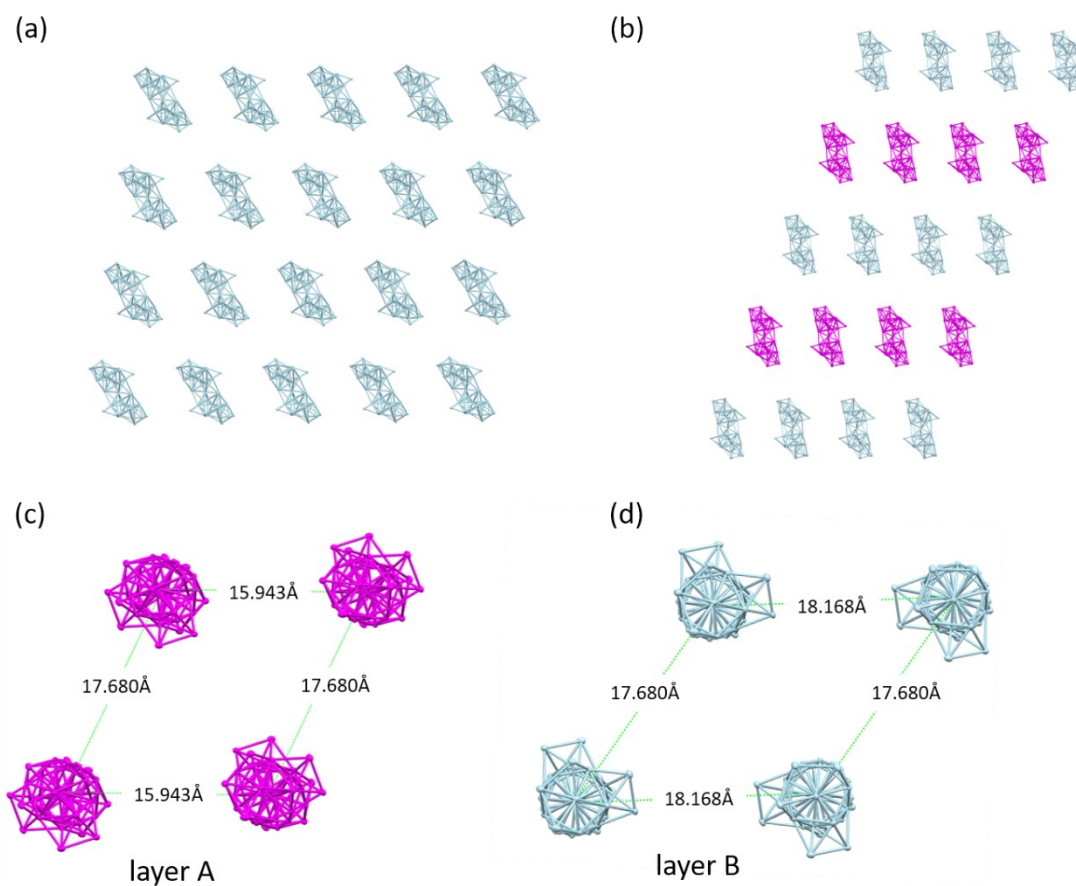

**Figure S6.** (a) Packing diagram of previously reported  $\text{Pt}_2\text{Ag}_{33}$  (b) packing diagram of **3** (c) layer A (d) layer B.

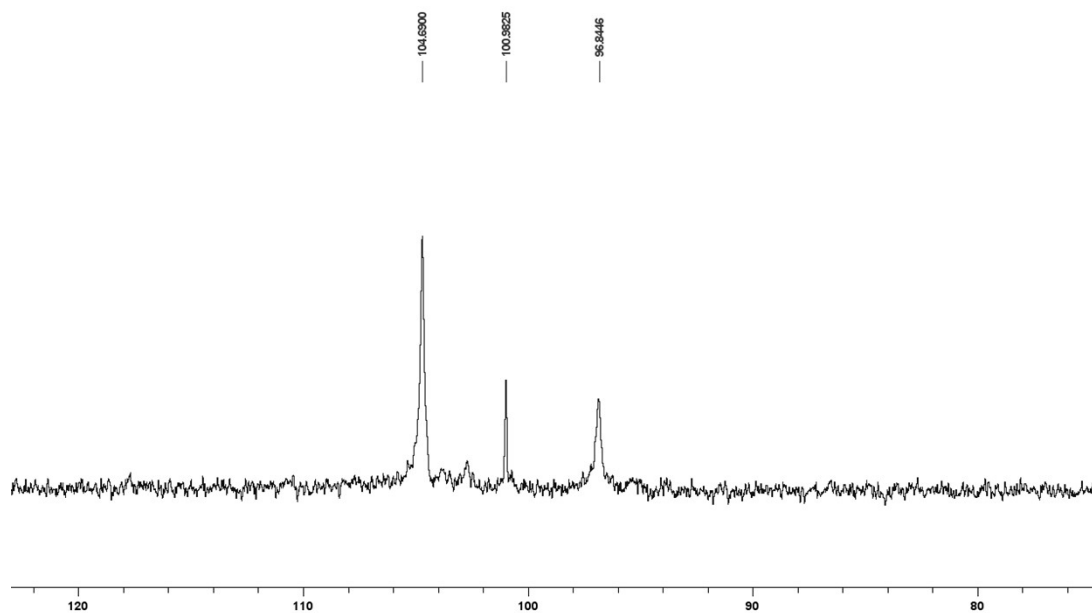

**Figure S7.**  $^{31}\text{P}$  NMR spectrum ( $\text{CDCl}_3$ ) of **1**.

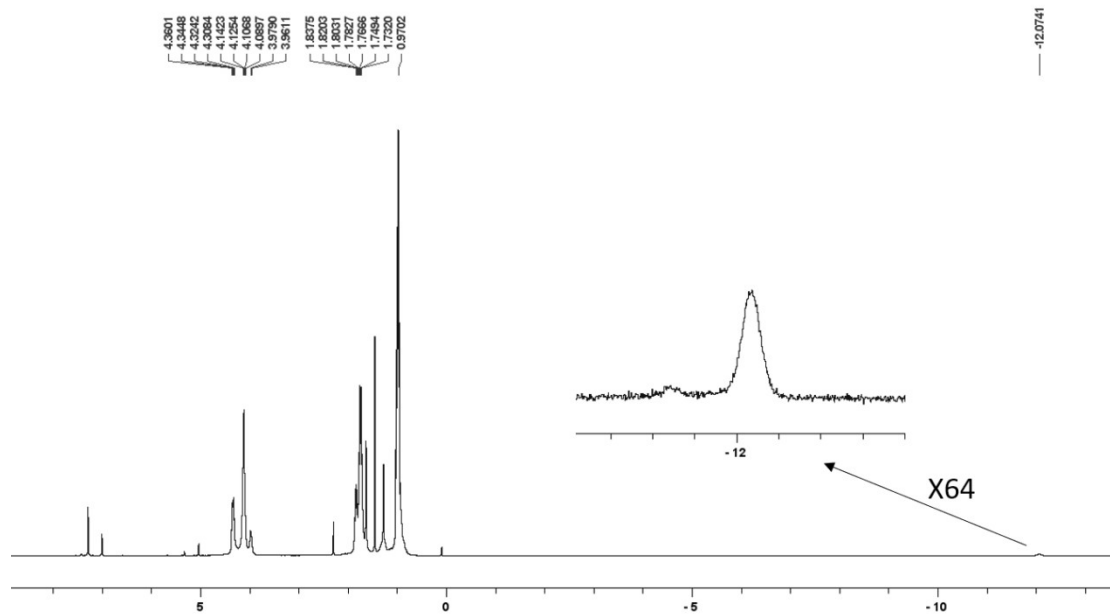

Figure S8.  $^1\text{H}$  NMR spectrum ( $\text{CDCl}_3$ ) of **1**.

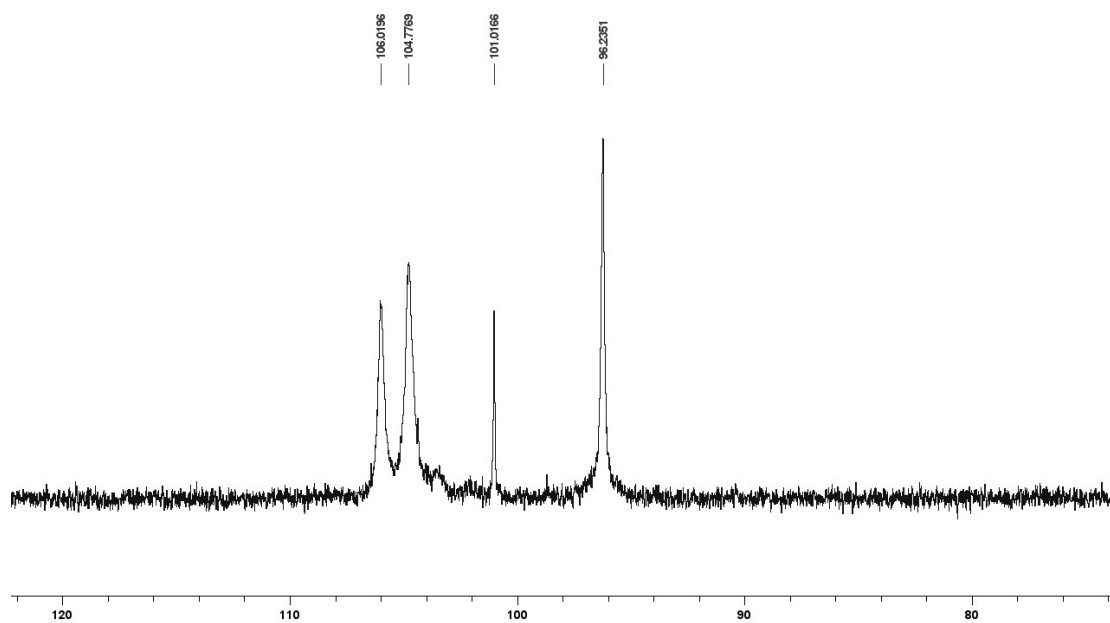

Figure S9.  $^{31}\text{P}$  NMR spectrum ( $\text{CDCl}_3$ ) of **2**.

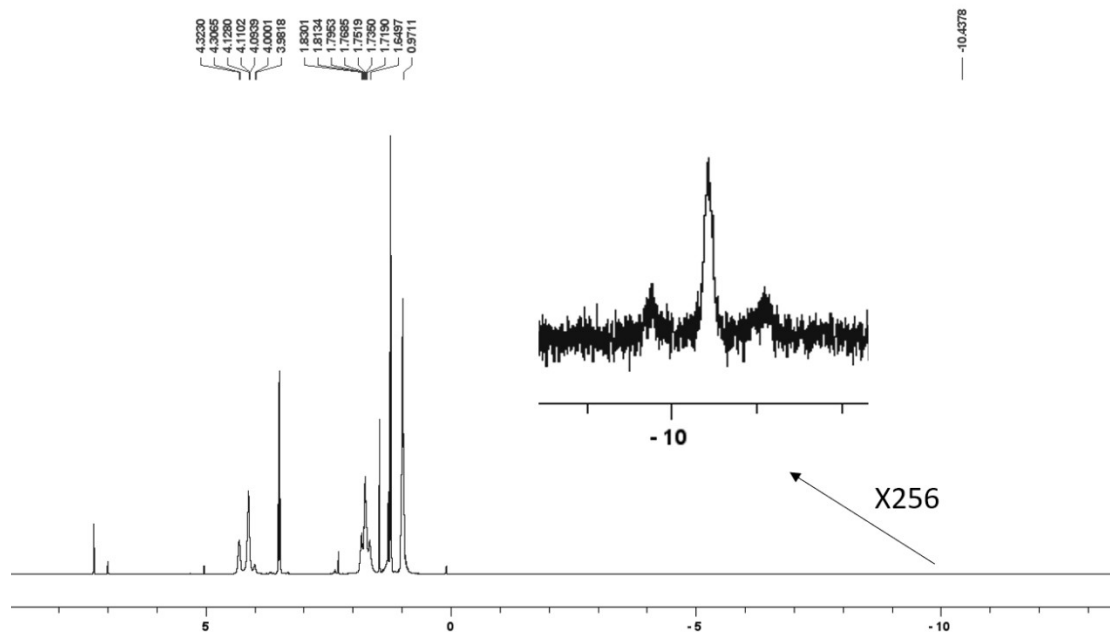

**Figure S10.**  $^1\text{H}$  NMR spectrum ( $\text{CDCl}_3$ ) of **2**.

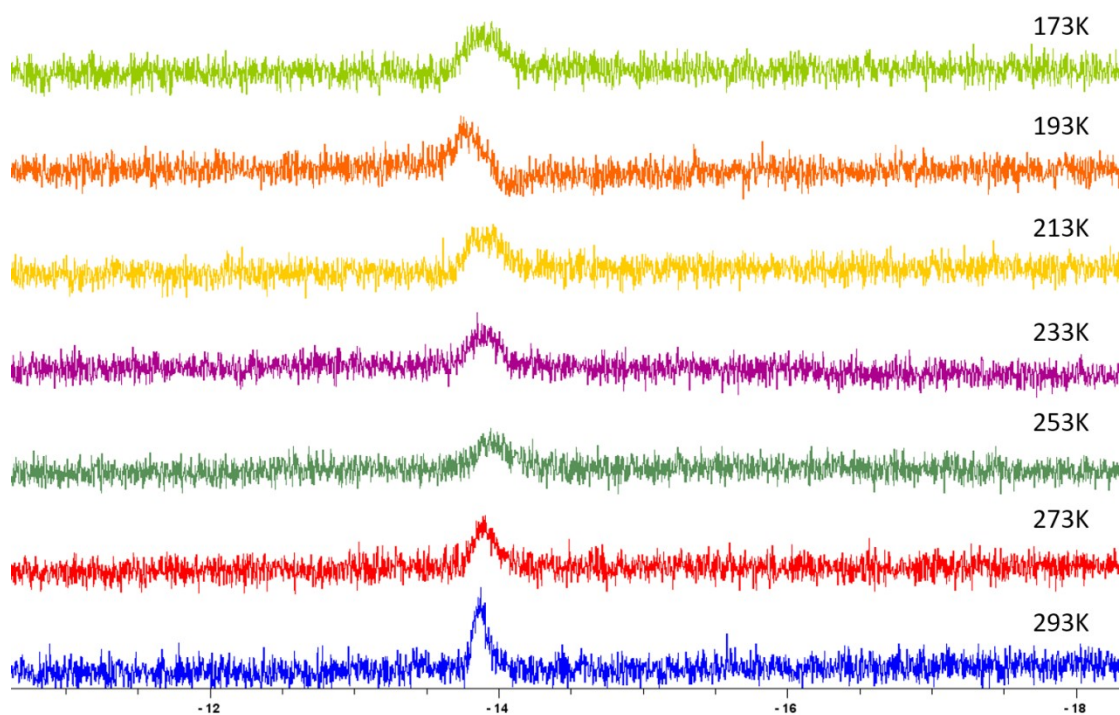

**Figure S11.** VT  $^1\text{H}$  NMR spectrum ( $\text{THF-d}_8$ ) of **1**.

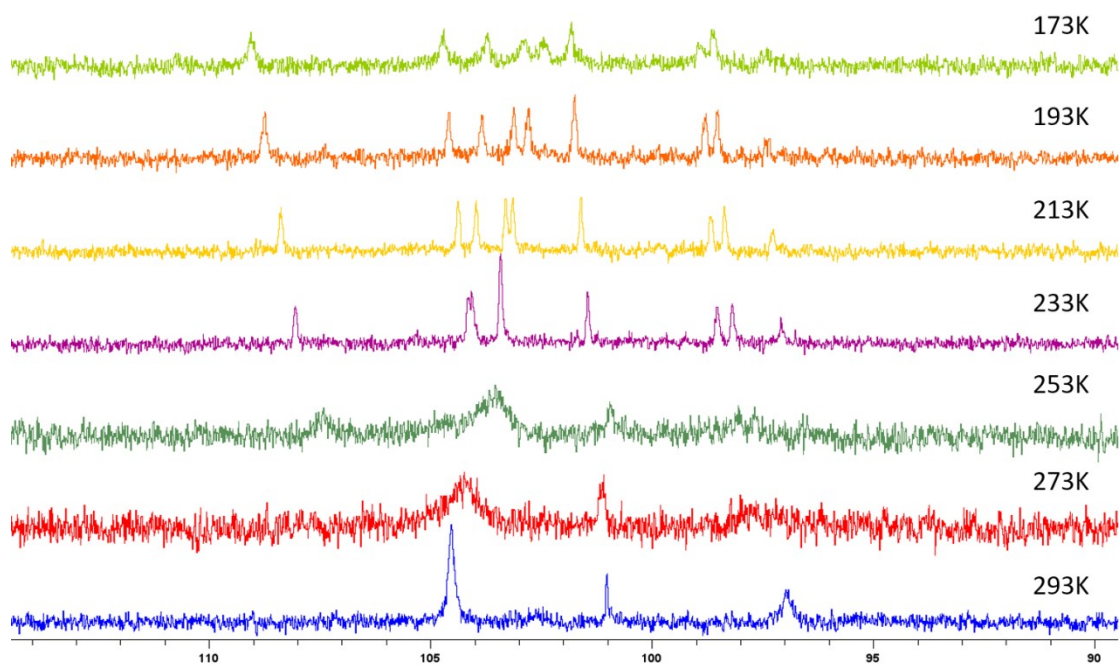

**Figure S12.** VT  $^{31}\text{P}$  NMR spectrum ( $\text{THF-d}_8$ ) of **1**.

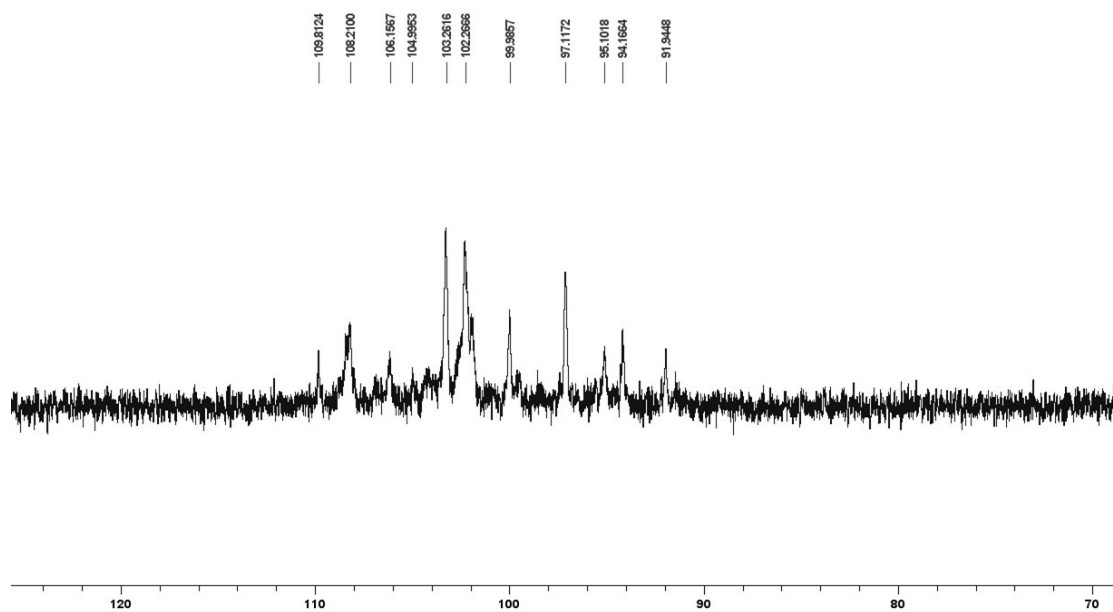

Figure S13.  $^{31}\text{P}$  NMR spectrum (THF-d8) of **2** at 173K.

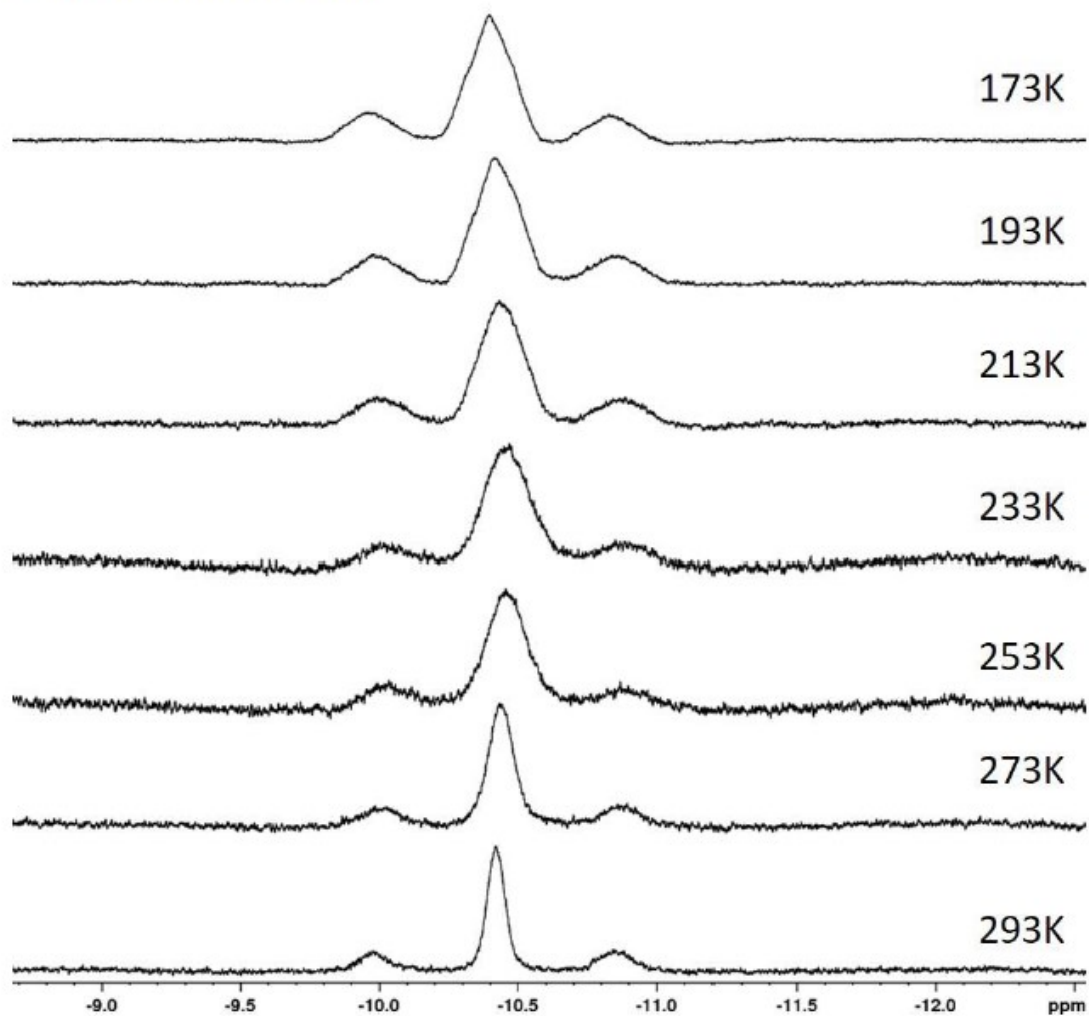

Figure S14. VT  $^1\text{H}$  NMR spectrum (THF-d8) of **2**.

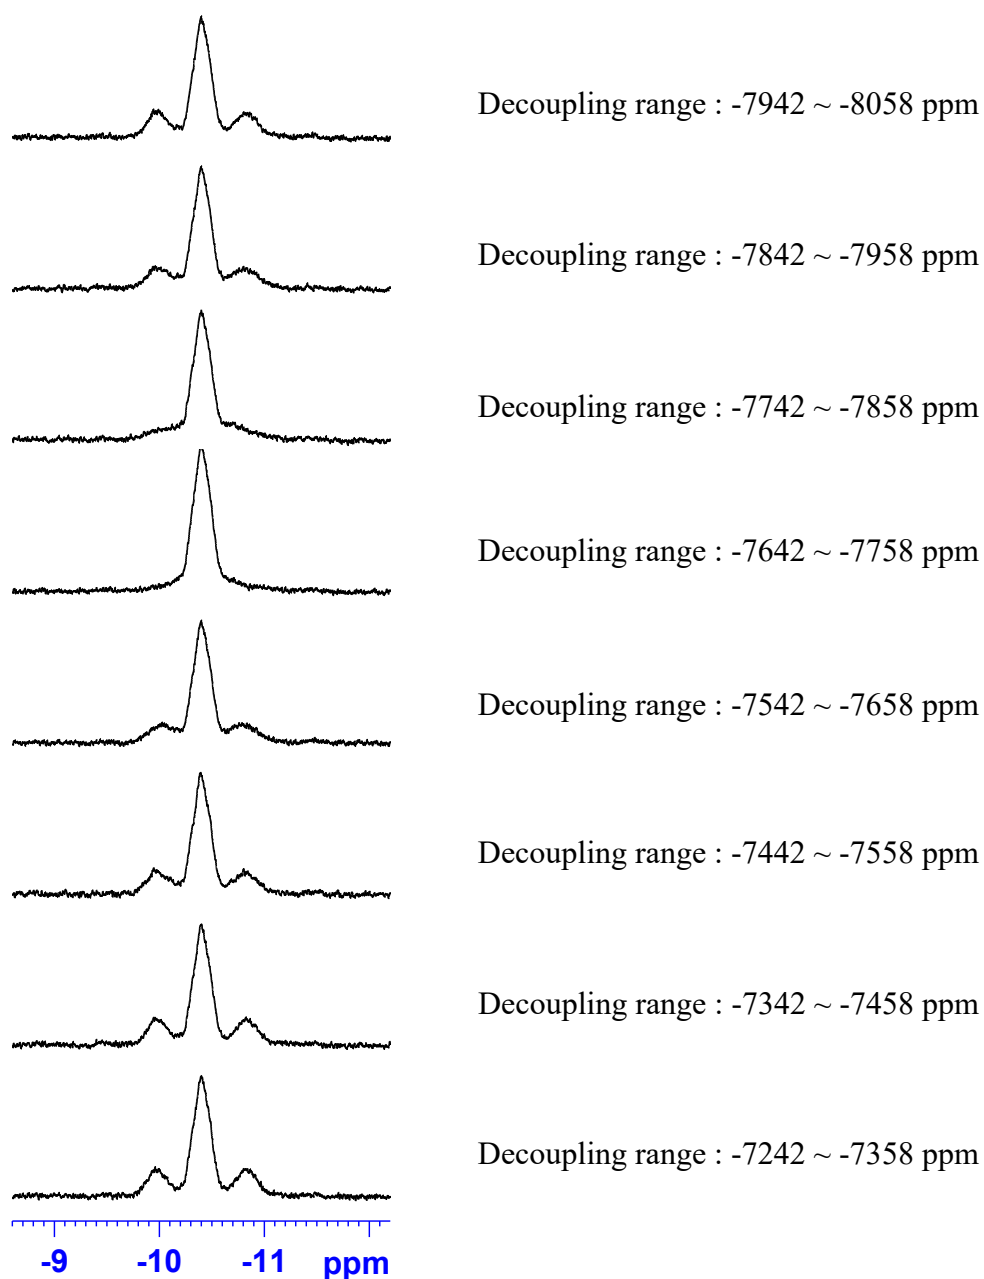

**Figure S15.**  $^1\text{H}\{^{195}\text{Pt}\}$  NMR spectra of **2** at 173 K with various  $^{195}\text{Pt}$  decoupling ranges.

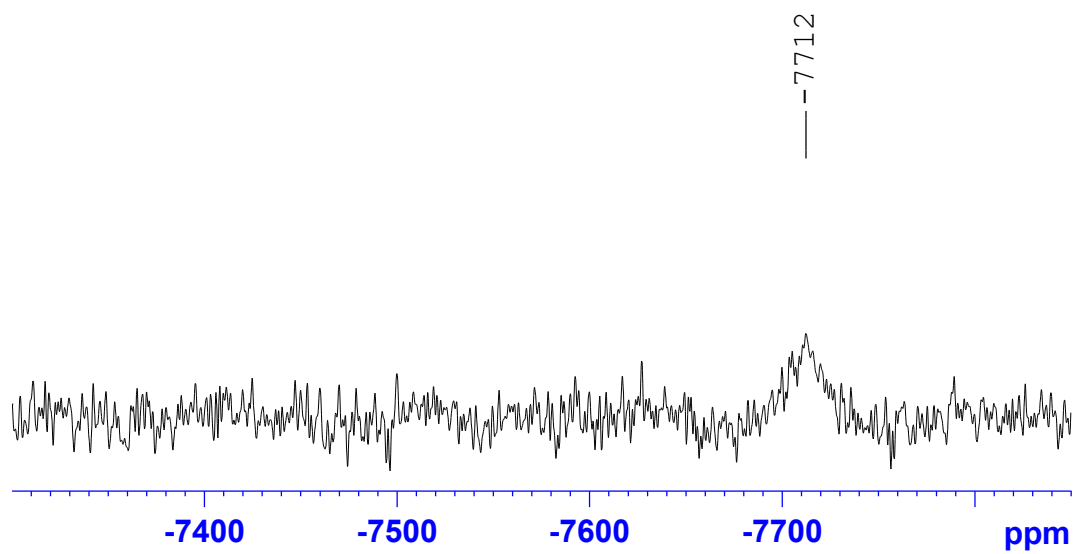

**Figure S16.** The  $^{195}\text{Pt}\{^1\text{H}\}$  spectrum of **2** at 173K.

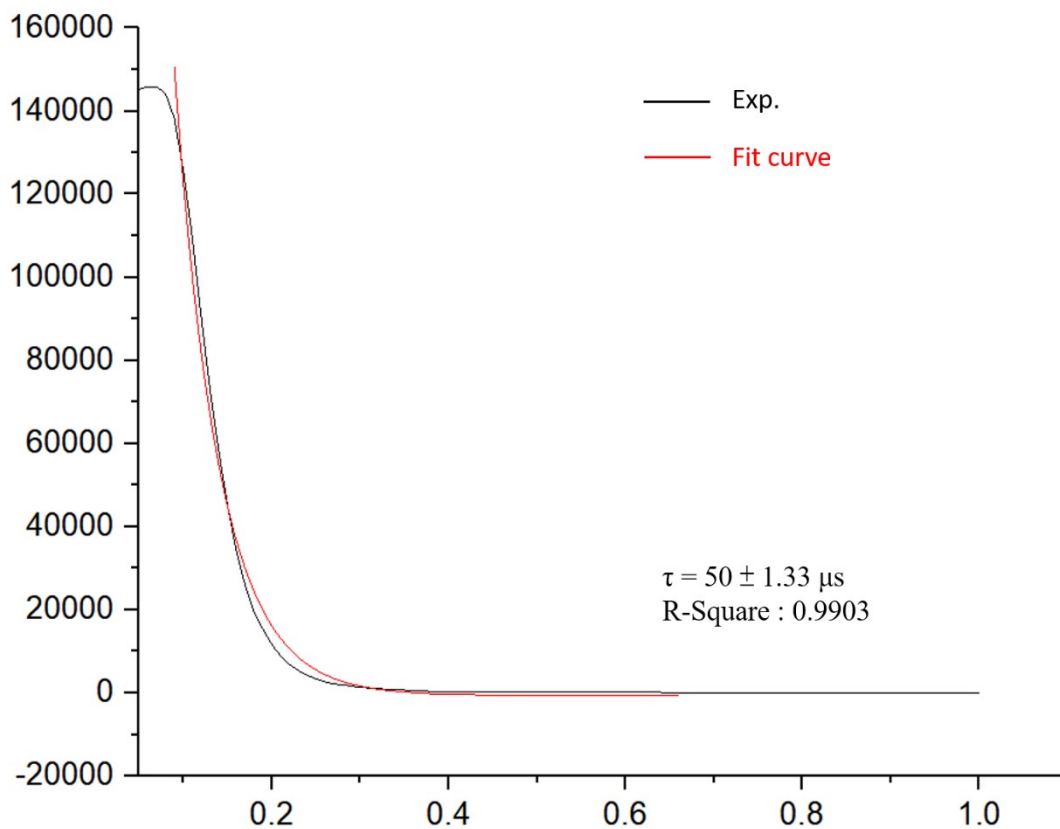

**Figure S17.** Time-resolved photoluminescence spectrum of **1**.

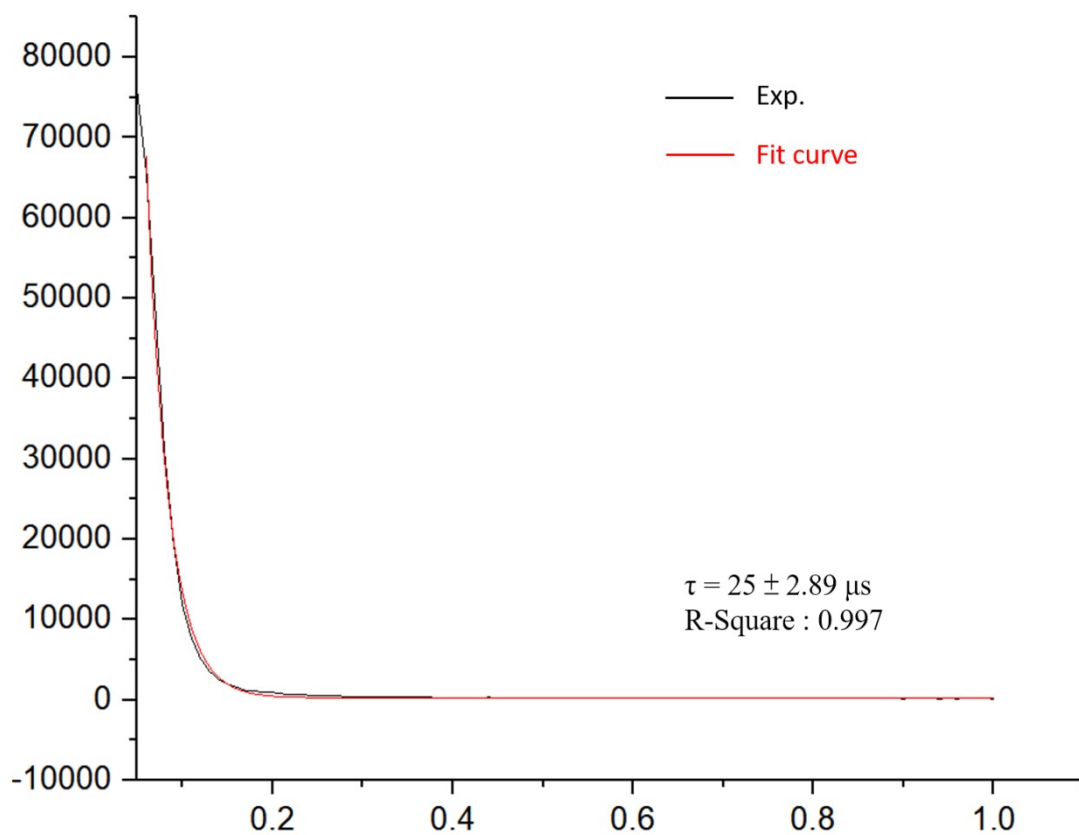

**Figure S18.** Time-resolved photoluminescence spectrum of **2**.



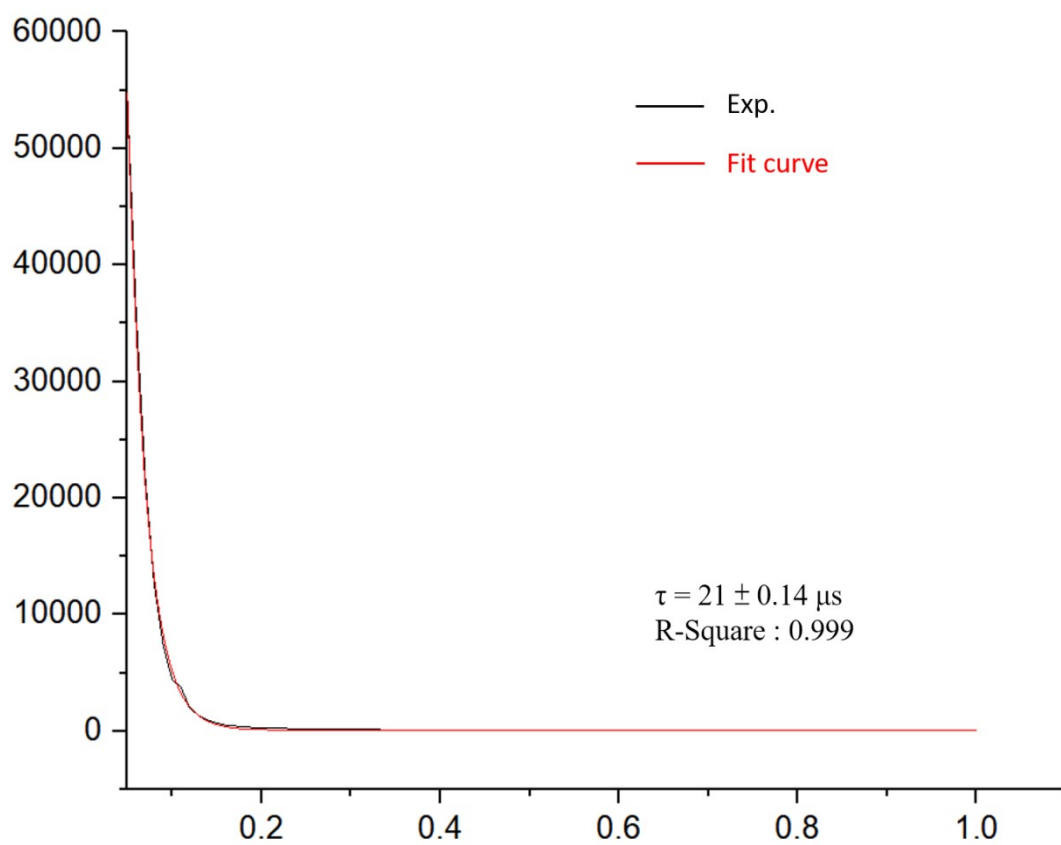

**Figure S19.** Time-resolved photoluminescence spectrum of **3**.

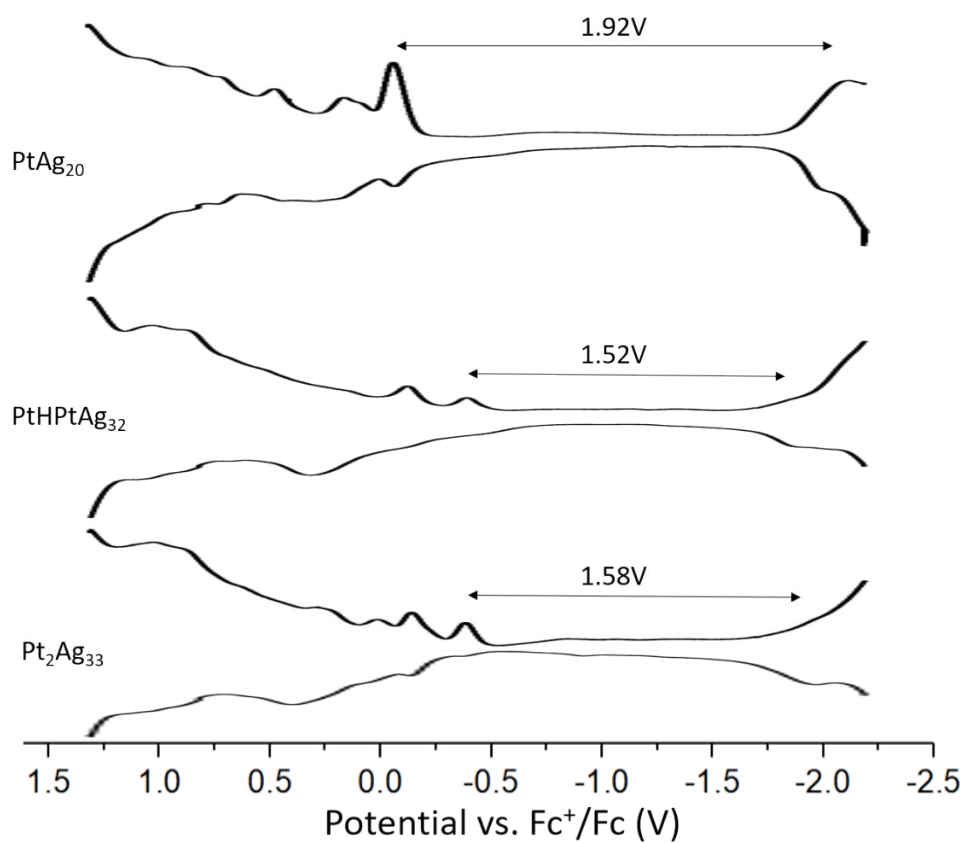

**Figure S20.** Differential pulse voltammograms of PtAg<sub>20</sub>[S<sub>2</sub>P(OPr)<sub>2</sub>]<sub>12</sub>, PtHPtAg<sub>32</sub>[S<sub>2</sub>P(OPr)<sub>2</sub>]<sub>17</sub> and Pt<sub>2</sub>Ag<sub>33</sub>[S<sub>2</sub>P(OPr)<sub>2</sub>]<sub>17</sub>.

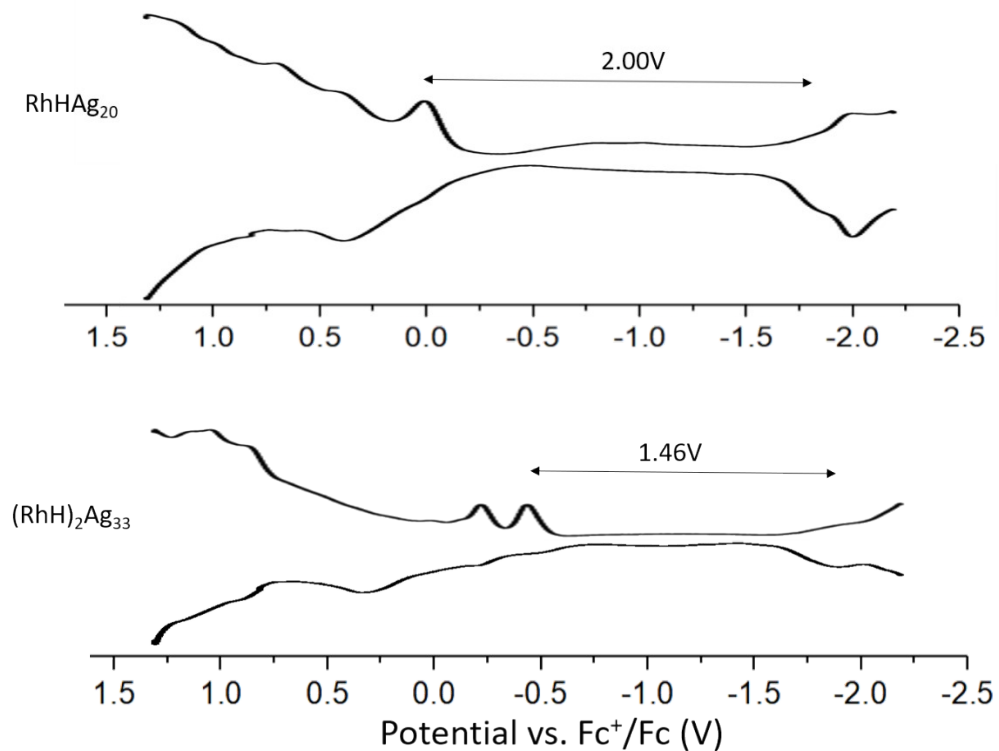

**Figure S21.** Differential pulse voltammograms of RhHAg<sub>20</sub>[S<sub>2</sub>P(OPr)<sub>2</sub>]<sub>12</sub> and (RhH)<sub>2</sub>Ag<sub>33</sub>[S<sub>2</sub>P(OPr)<sub>2</sub>]<sub>17</sub>.

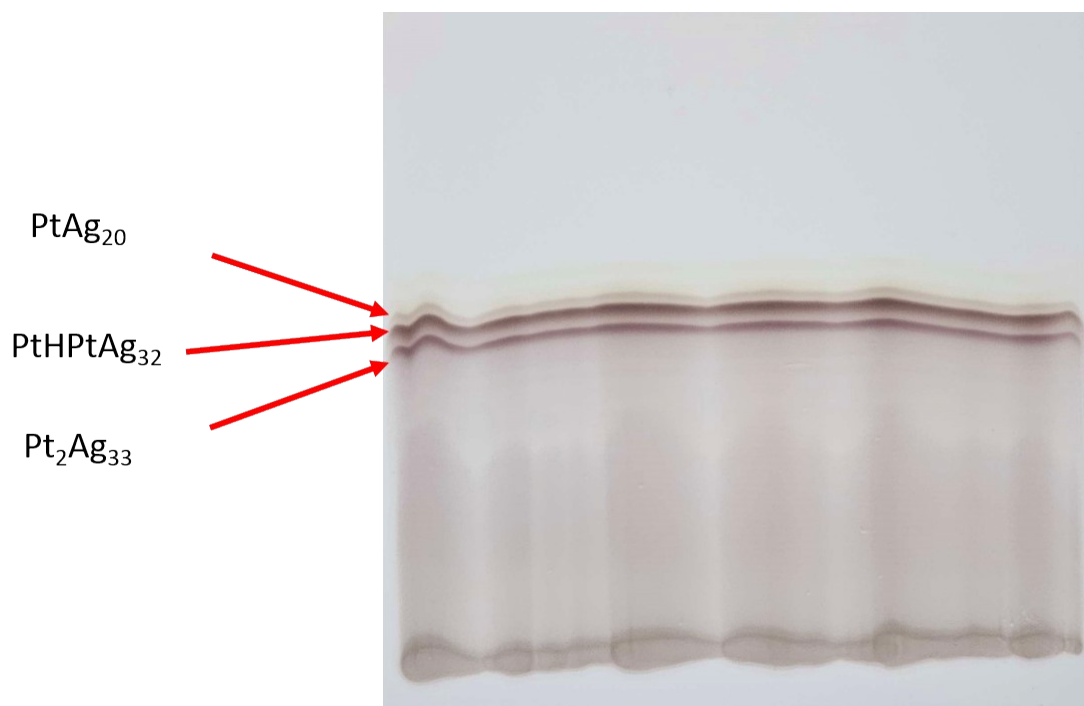

**Figure S22.** Photo of TLC under eluent combination: ether: hexane = 1:4.

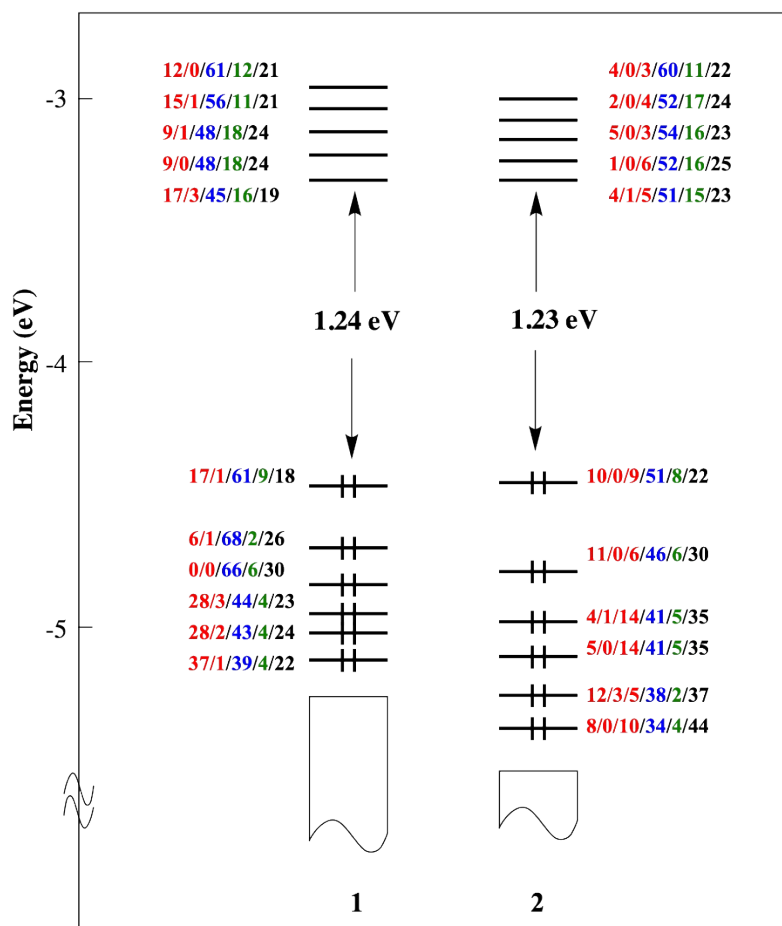

**Figure S23.** The Kohn-Sham frontier MO diagram of compounds **1** and **2** with orbital compositions as follows. **1**:  $\text{Rh}_2/\text{H}_2/\text{Ag}_{23}(\text{ico})/\text{Ag}_{10}(\text{cap})/\text{ligands}$ ; **2**:  $\text{Pt}/\text{H}/\text{Pt}/\text{Ag}_{23}(\text{ico})/\text{Ag}_9(\text{cap})/\text{ligands}$ . The hydride of **2** lies in the left-side icosahedron.

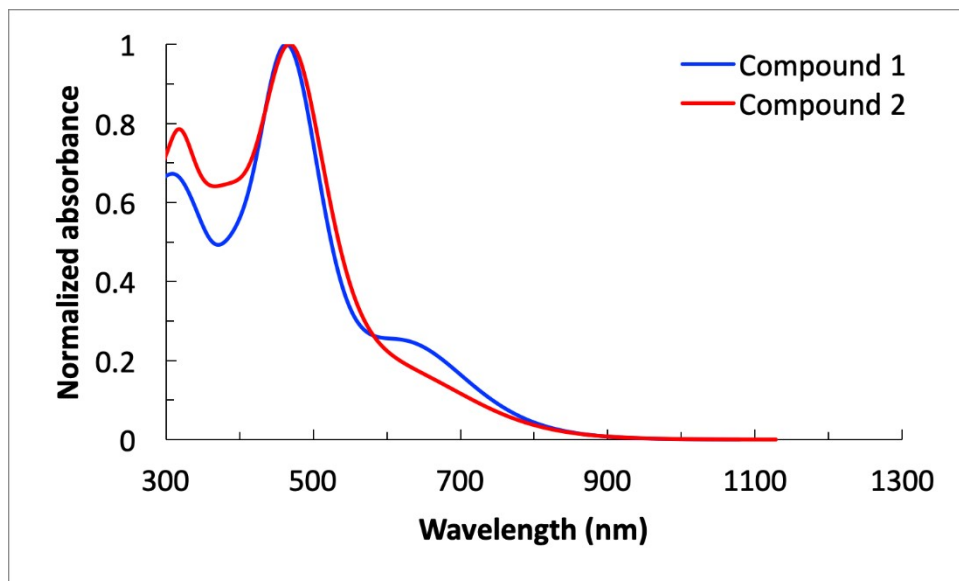

**Figure S24.** The TD-DFT-simulated UV-vis spectra of **1** and **2**.

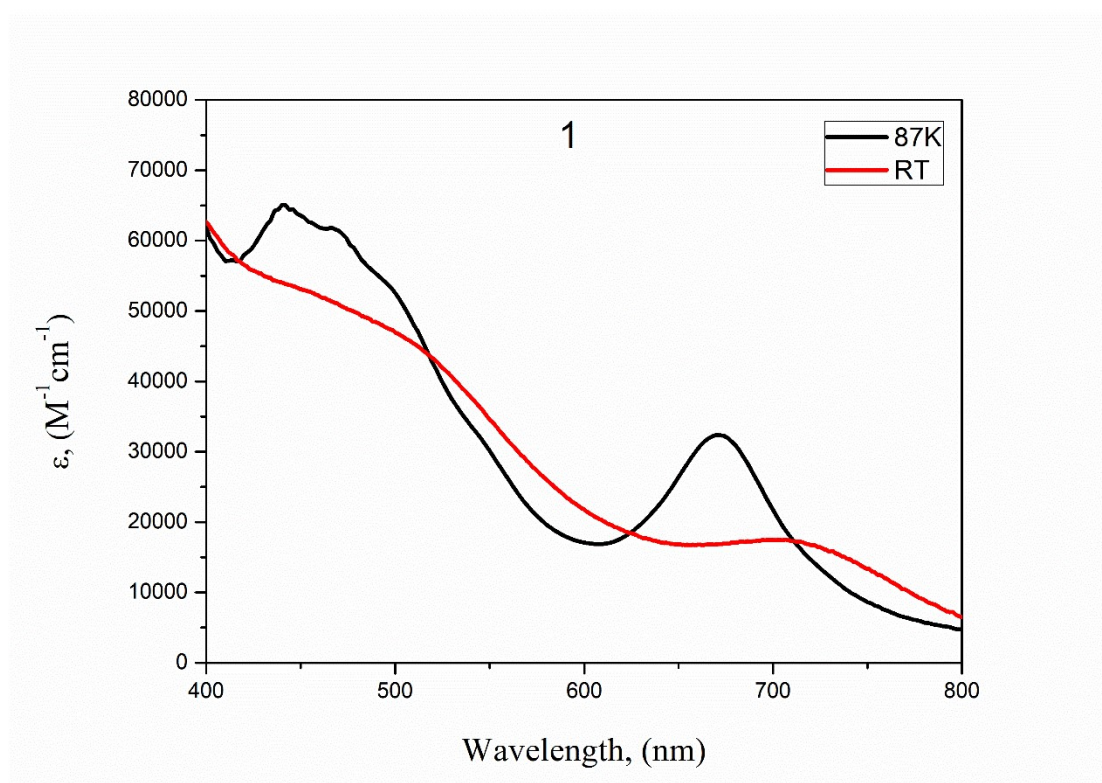

**Figure S25.** Low-temperature excitation spectra of Compound **1**.

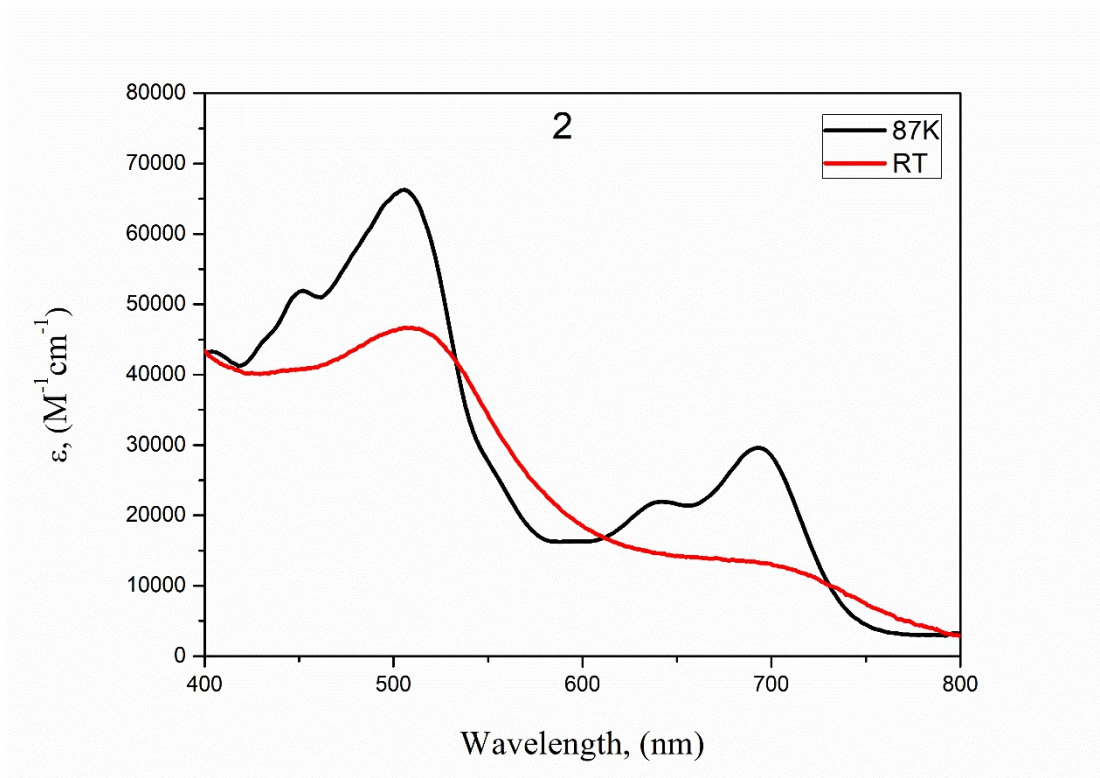

**Figure S26.** Low-temperature excitation spectra of Compound 2.

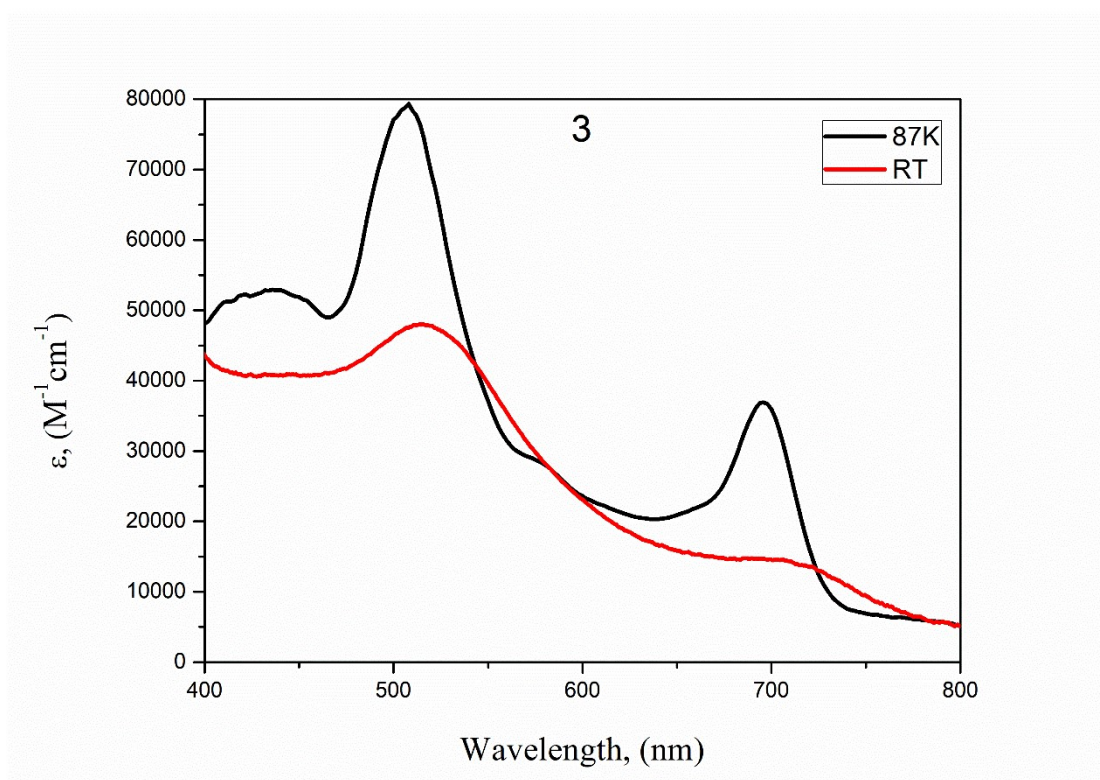

**Figure S27.** Low-temperature excitation spectra of Compound 3.

**Table S1.** Selected X-ray crystallographic data of **1,2** and **3**.

| Compound                                                  | <b>1</b>                                                                                                           | <b>2</b>                                                                                                           | <b>3</b>                                                                                                           |
|-----------------------------------------------------------|--------------------------------------------------------------------------------------------------------------------|--------------------------------------------------------------------------------------------------------------------|--------------------------------------------------------------------------------------------------------------------|
| CCDC no.                                                  | 2342395                                                                                                            | 2342396                                                                                                            | 2342397                                                                                                            |
| Chemical formula                                          | C <sub>204</sub> H <sub>480</sub> Ag <sub>66</sub> O <sub>68</sub> P <sub>34</sub> Rh <sub>4</sub> S <sub>68</sub> | C <sub>102</sub> H <sub>239</sub> Ag <sub>32</sub> O <sub>34</sub> P <sub>17</sub> Pt <sub>2</sub> S <sub>34</sub> | C <sub>102</sub> H <sub>238</sub> Ag <sub>33</sub> O <sub>34</sub> P <sub>17</sub> Pt <sub>2</sub> S <sub>34</sub> |
| Formula weight                                            | 14785.97                                                                                                           | 7468.47                                                                                                            | 7575.33                                                                                                            |
| Wavelength, Å                                             | 0.71073                                                                                                            | 0.71073                                                                                                            | 0.71073                                                                                                            |
| Crystal System                                            | Triclinic                                                                                                          | Triclinic                                                                                                          | Monoclinic                                                                                                         |
| Space group                                               | <i>P</i> $\bar{1}$                                                                                                 | <i>P</i> $\bar{1}$                                                                                                 | <i>C</i> 2/ <i>c</i>                                                                                               |
| a, Å                                                      | 16.193(2)                                                                                                          | 19.4846(11)                                                                                                        | 44.382(7)                                                                                                          |
| b, Å                                                      | 34.224(5)                                                                                                          | 20.7482(12)                                                                                                        | 17.680(3)                                                                                                          |
| c, Å                                                      | 38.997(5)                                                                                                          | 30.0519(17)                                                                                                        | 28.939(4)                                                                                                          |
| $\alpha$ , deg.                                           | 72.855(4)                                                                                                          | 98.0114(14)                                                                                                        | 90                                                                                                                 |
| $\beta$ , deg.                                            | 84.982(3)                                                                                                          | 102.1599(14)                                                                                                       | 111.569(5)                                                                                                         |
| $\gamma$ , deg.                                           | 83.671(2)                                                                                                          | 116.0390(13)                                                                                                       | 90                                                                                                                 |
| V, Å <sup>3</sup>                                         | 20491(5)                                                                                                           | 10292.5(10)                                                                                                        | 21118(6)                                                                                                           |
| Z                                                         | 2                                                                                                                  | 2                                                                                                                  | 4                                                                                                                  |
| Temperature, K                                            | 100(2)                                                                                                             | 100(2)                                                                                                             | 100(2)                                                                                                             |
| $\rho_{\text{calcd}}$ , g/cm <sup>3</sup>                 | 2.396                                                                                                              | 2.410                                                                                                              | 2.383                                                                                                              |
| $\mu$ , mm <sup>-1</sup>                                  | 3.759                                                                                                              | 4.846                                                                                                              | 4.814                                                                                                              |
| $\theta_{\text{max}}$ , deg.                              | 25.000                                                                                                             | 25.000                                                                                                             | 25.000                                                                                                             |
| Completeness, %                                           | 99.7                                                                                                               | 98.8                                                                                                               | 100                                                                                                                |
| Reflection collected<br>/ unique                          | 233268 / 71948<br>[R(int) = 0.0907]                                                                                | 67817 / 35841<br>[R(int) = 0.0445]                                                                                 | 91475 / 18602<br>[R(int) = 0.0280]                                                                                 |
| Restraints /<br>parameters                                | 1470 / 4132                                                                                                        | 861 / 2070                                                                                                         | 359 / 1063                                                                                                         |
| <sup>a</sup> R1, <sup>b</sup> wR2 [I ><br>2 $\sigma$ (I)] | 0.0666, 0.1254                                                                                                     | 0.0555, 0.1333                                                                                                     | 0.0364, 0.0733                                                                                                     |
| <sup>a</sup> R1, <sup>b</sup> wR2 (all data)              | 0.1174, 0.1519                                                                                                     | 0.0802, 0.1511                                                                                                     | 0.0448, 0.0811                                                                                                     |
| GOF                                                       | 1.103                                                                                                              | 1.032                                                                                                              | 1.113                                                                                                              |
| Largest diff. peak<br>and<br>hole, e/Å <sup>3</sup>       | 2.570 and -1.806                                                                                                   | 3.721 and -1.917                                                                                                   | 2.805 and -1.366                                                                                                   |

$$^a R1 = \frac{\sum |F_o - F_c|}{\sum F_o}, \quad ^b wR2 = \left\{ \frac{\sum [w(F_o^2 - F_c^2)^2]}{\sum [w(F_o^2)]} \right\}^{1/2}.$$

**Table S2.** Cartesian coordinates of the DFT-optimised structures of **1**, **2**, and **3**.

| <b>1</b> |           |           |           |
|----------|-----------|-----------|-----------|
| Ag       | -0.010295 | 0.015327  | -0.039281 |
| Rh       | -2.842274 | 0.027720  | 0.052654  |
| Ag       | -5.689982 | 0.194844  | 0.284859  |
| Ag       | -4.010817 | 2.572892  | 0.575700  |
| Ag       | -4.013423 | 0.465799  | 2.673238  |
| Ag       | -4.078994 | -2.176638 | 1.257358  |
| Ag       | -4.417730 | -1.575933 | -1.718860 |
| Ag       | -4.154450 | 1.311926  | -2.123495 |
| Ag       | -1.327861 | -2.688926 | -0.047693 |
| Ag       | -1.538361 | -1.035542 | 2.335123  |
| Ag       | -1.482807 | 1.826784  | 1.821179  |
| Ag       | -1.553212 | 2.263943  | -1.164577 |
| Ag       | -1.668868 | -0.335833 | -2.568506 |
| Rh       | 2.836773  | 0.015214  | 0.041589  |
| Ag       | 5.687163  | -0.194789 | 0.280958  |
| Ag       | 1.533660  | -2.277573 | -1.062943 |
| Ag       | 1.471184  | -1.694010 | 1.889255  |
| Ag       | 1.539992  | 1.176119  | 2.287547  |
| Ag       | 1.310114  | 2.733768  | -0.154717 |
| Ag       | 1.641169  | 0.284879  | -2.550908 |
| Ag       | 4.097565  | 2.248884  | 1.134677  |
| Ag       | 4.448383  | 1.554531  | -1.736236 |
| Ag       | 4.119698  | -1.345919 | -2.094327 |
| Ag       | 3.988100  | -2.527912 | 0.654214  |
| Ag       | 3.999159  | -0.346455 | 2.674585  |
| Ag       | -6.776625 | -1.372123 | 2.610093  |
| Ag       | -6.819600 | -2.620878 | -0.338460 |
| Ag       | -6.935332 | 0.081712  | -2.428473 |
| Ag       | -3.848695 | 4.363803  | -1.808892 |
| Ag       | -1.762101 | 4.667631  | 0.741574  |
| Ag       | 1.768342  | -4.605633 | 0.909236  |
| Ag       | 6.918986  | -0.160045 | -2.418878 |
| Ag       | 6.911692  | 2.590875  | -0.424118 |
| Ag       | 3.849083  | -4.388103 | -1.691910 |
| Ag       | 6.775563  | 1.396327  | 2.570021  |
| S        | -8.016643 | 0.720349  | 1.583220  |



|   |           |           |           |
|---|-----------|-----------|-----------|
| S | -8.934328 | -1.242409 | -1.255872 |
| S | -7.822888 | -3.700547 | 1.832873  |
| S | -4.435624 | -4.682471 | 1.771329  |
| S | -5.550128 | -1.757717 | 4.828476  |
| S | -5.060799 | 1.711929  | 4.658157  |
| S | -7.577560 | 2.597297  | -2.513102 |
| S | -4.435130 | 3.138013  | -4.036115 |
| S | -6.012502 | -1.216385 | -4.496272 |
| S | -5.588091 | -3.914279 | -2.305926 |
| S | -5.748141 | 4.573807  | 0.034379  |
| S | -3.463813 | 5.073691  | 2.648012  |
| S | 0.059708  | 2.693058  | 3.840583  |
| S | 0.812964  | 4.972918  | 1.226143  |
| S | -2.035372 | 6.204420  | -1.437035 |
| S | 0.212775  | 3.676692  | -2.548645 |
| S | -0.053021 | -2.487255 | 3.942995  |
| S | -0.795622 | -4.860290 | 1.409374  |
| S | -1.731950 | -1.155900 | -4.958388 |
| S | 1.201083  | 0.784660  | -4.965524 |
| S | -0.220063 | -3.736408 | -2.418007 |
| S | 2.050508  | -6.211914 | -1.221825 |
| S | 5.758275  | -4.522449 | 0.147466  |
| S | 3.503807  | -4.962577 | 2.791413  |
| S | 4.371835  | -3.225749 | -3.955820 |
| S | 7.540413  | -2.691116 | -2.505355 |
| S | 7.998045  | -0.732512 | 1.601843  |
| S | 8.973189  | 1.137728  | -1.280864 |
| S | 4.491235  | 4.745949  | 1.640012  |
| S | 7.862652  | 3.692761  | 1.761767  |
| S | 5.664903  | 3.834092  | -2.416129 |
| S | 6.083740  | 1.088000  | -4.552324 |
| S | 5.072147  | -1.653225 | 4.628099  |
| S | 5.541838  | 1.804893  | 4.779035  |
| P | -9.403739 | -0.054971 | 0.322011  |
| P | -6.273273 | -4.805956 | 2.573112  |
| P | -5.658807 | 0.079608  | 5.673726  |
| P | -6.481129 | 3.209924  | -4.069515 |
| P | -6.421878 | -3.114800 | -3.987062 |

|   |            |           |           |
|---|------------|-----------|-----------|
| P | -4.984341  | 5.744304  | 1.518950  |
| P | 0.900375   | 4.421947  | 3.188979  |
| P | -0.334917  | 5.615205  | -2.389692 |
| P | -0.878755  | -4.249309 | 3.347550  |
| P | 0.182570   | -0.868387 | -5.514988 |
| P | 0.351184   | -5.664279 | -2.200614 |
| P | 5.003712   | -5.668552 | 1.654108  |
| P | 6.416299   | -3.295021 | -4.043439 |
| P | 9.410032   | -0.004942 | 0.342071  |
| P | 6.316763   | 4.826728  | 2.473868  |
| P | 6.518711   | 2.986368  | -4.062258 |
| P | 5.652595   | -0.025144 | 5.644158  |
| H | -10.383803 | -0.749696 | 1.081145  |
| H | -10.160504 | 1.033567  | -0.178750 |
| H | -6.677101  | -6.170513 | 2.526079  |
| H | -6.234014  | -4.582981 | 3.975336  |
| H | -6.979209  | 0.281736  | 6.167021  |
| H | -4.954976  | -0.040901 | 6.904635  |
| H | -6.861695  | 4.542459  | -4.376203 |
| H | -6.853893  | 2.540885  | -5.265172 |
| H | -7.823749  | -3.349304 | -3.948282 |
| H | -6.043006  | -3.955683 | -5.067743 |
| H | -4.684898  | 7.023132  | 0.980501  |
| H | -6.067117  | 6.062454  | 2.382309  |
| H | 2.266414   | 4.444536  | 3.576285  |
| H | 0.334508   | 5.473249  | 3.955772  |
| H | -0.379048  | 6.146734  | -3.702503 |
| H | 0.723294   | 6.367557  | -1.816547 |
| H | -2.245924  | -4.291745 | 3.726787  |
| H | -0.310046  | -5.289731 | 4.128759  |
| H | 0.947785   | -2.019811 | -5.186041 |
| H | 0.225110   | -0.922299 | -6.933610 |
| H | 0.403143   | -6.239425 | -3.498374 |
| H | -0.706426  | -6.405702 | -1.612704 |
| H | 4.695277   | -6.959519 | 1.139790  |
| H | 6.092307   | -5.979561 | 2.509658  |
| H | 6.748193   | -2.610550 | -5.243667 |
| H | 6.782642   | -4.625082 | -4.379765 |

|   |           |           |           |
|---|-----------|-----------|-----------|
| H | 10.165180 | -1.118946 | -0.107783 |
| H | 10.380209 | 0.699442  | 1.102225  |
| H | 6.750529  | 6.177062  | 2.428719  |
| H | 6.184929  | 3.822611  | -5.159511 |
| H | 7.922555  | 3.195107  | -3.984529 |
| H | 4.938901  | 0.070347  | 6.871700  |
| H | 6.967853  | -0.242400 | 6.142447  |
| H | 6.253926  | 4.603042  | 3.879042  |
| H | -2.483475 | -1.292254 | -0.890630 |
| H | 2.480709  | 1.311215  | -0.944645 |

## 2

|    |           |           |           |
|----|-----------|-----------|-----------|
| Pt | -2.998563 | 0.120179  | 0.036290  |
| H  | -3.056190 | -0.891558 | -1.319538 |
| Pt | 2.654767  | -0.145138 | 0.181625  |
| Ag | -5.868154 | 0.342218  | 0.272754  |
| Ag | -4.200564 | -0.343116 | 2.608030  |
| Ag | -4.305601 | -2.330997 | 0.338381  |
| Ag | -4.745649 | -0.470670 | -2.309168 |
| Ag | -4.157516 | 2.303904  | -1.469858 |
| Ag | -4.151726 | 2.398742  | 1.479268  |
| Ag | -1.530715 | -2.295554 | -1.042008 |
| Ag | -1.685135 | -1.789839 | 1.936751  |
| Ag | -1.683766 | 1.103599  | 2.401019  |
| Ag | -1.537624 | 2.624783  | -0.053769 |
| Ag | -1.734154 | 0.746429  | -2.411001 |
| Ag | -0.166345 | 0.008244  | 0.081520  |
| Ag | 1.354354  | -1.572962 | -1.914894 |
| Ag | 1.243959  | -2.505017 | 0.952927  |
| Ag | 1.243611  | -0.102626 | 2.721899  |
| Ag | 1.439575  | 2.322645  | 0.899378  |
| Ag | 1.460335  | 1.460107  | -1.896296 |
| Ag | 3.825305  | -2.645710 | -0.479134 |
| Ag | 3.766469  | -1.657993 | 2.337700  |
| Ag | 3.838196  | 1.324246  | 2.292610  |
| Ag | 4.049214  | 2.164695  | -0.599423 |
| Ag | 3.936678  | -0.223377 | -2.327978 |
| Ag | 5.501132  | -0.330989 | 0.328303  |

|    |           |           |           |
|----|-----------|-----------|-----------|
| Ag | -6.649062 | -2.190254 | 2.283355  |
| Ag | -7.205829 | -2.023675 | -1.055941 |
| Ag | -3.426105 | 5.022777  | -0.192412 |
| Ag | -1.732605 | 3.806968  | -2.814814 |
| Ag | 1.559639  | -4.579777 | -1.265785 |
| Ag | 3.710000  | -3.129462 | -3.426704 |
| Ag | 6.639584  | 1.090241  | -2.005627 |
| Ag | 6.517200  | 2.520924  | 0.988457  |
| Ag | 6.578242  | 0.123535  | 3.120250  |
| S  | -7.951213 | -0.061656 | 2.868207  |
| S  | -8.392653 | 0.287556  | -0.599651 |
| S  | -8.026051 | -3.821835 | 0.695509  |
| S  | -4.795697 | -4.761837 | -0.376472 |
| S  | -4.738606 | -3.570825 | 3.394084  |
| S  | -4.685094 | -0.546563 | 5.141203  |
| S  | -6.288861 | 3.456876  | 2.558326  |
| S  | -3.314734 | 5.240454  | 2.353826  |
| S  | -5.641199 | 4.628269  | -1.500385 |
| S  | -3.837178 | 3.621227  | -4.311144 |
| S  | -6.256520 | -2.816258 | -3.307456 |
| S  | -5.957774 | 0.447261  | -4.426647 |
| S  | -1.051964 | -4.888561 | -1.039799 |
| S  | -0.336658 | -4.108169 | 2.334561  |
| S  | -0.239700 | -1.426546 | 4.530218  |
| S  | -0.416565 | 2.034584  | 4.416770  |
| S  | 0.034750  | 4.476477  | 1.191404  |
| S  | -1.392766 | 6.117808  | -1.548759 |
| S  | 0.729613  | 3.203162  | -3.672136 |
| S  | -1.525633 | 0.862953  | -4.982825 |
| S  | -0.255878 | -2.256652 | -3.853827 |
| S  | 1.982128  | -5.028292 | -3.874877 |
| S  | 3.306864  | -5.764069 | 0.238890  |
| S  | 5.601885  | -4.135885 | -1.855704 |
| S  | 4.931582  | -3.616620 | 3.512105  |
| S  | 5.204076  | -0.547645 | 5.173793  |
| S  | 4.073619  | 3.397191  | 3.784453  |
| S  | 7.492445  | 2.596946  | 3.422959  |
| S  | 5.814677  | 3.130821  | -3.406314 |

|   |            |           |           |
|---|------------|-----------|-----------|
| S | 5.217547   | 4.518302  | -0.226927 |
| S | 4.180247   | -1.001648 | -4.850472 |
| S | 7.314808   | -1.115382 | -3.246694 |
| S | 7.847495   | -1.275720 | 1.295274  |
| S | 8.677733   | 1.758995  | -0.410019 |
| P | -9.169888  | 0.042430  | 1.272798  |
| P | -6.554301  | -5.215596 | 0.485466  |
| P | -4.417641  | -2.538304 | 5.116024  |
| P | -5.276436  | 5.154907  | 2.890798  |
| P | -5.111568  | 4.918333  | -3.444959 |
| P | -6.828842  | -1.351865 | -4.601895 |
| P | -1.199011  | -5.305691 | 0.948129  |
| P | -0.701375  | 0.321349  | 5.449657  |
| P | 0.240665   | 5.687626  | -0.420694 |
| P | 0.174241   | 1.894617  | -5.151360 |
| P | 0.274416   | -4.098927 | -4.486590 |
| P | 4.803385   | -5.856338 | -1.103363 |
| P | 5.355081   | -2.569775 | 5.171829  |
| P | 5.914483   | 3.244388  | 4.554619  |
| P | 6.112247   | 4.588342  | -2.063083 |
| P | 6.229581   | -0.941151 | -4.913982 |
| P | 9.192497   | 0.012157  | 0.488324  |
| H | -10.068879 | -1.058199 | 1.235347  |
| H | -10.071906 | 1.119570  | 1.474494  |
| H | -7.108756  | -6.309637 | -0.229505 |
| H | -6.359307  | -5.795592 | 1.767423  |
| H | -5.193955  | -3.113609 | 6.159912  |
| H | -3.106671  | -2.882813 | 5.542866  |
| H | -5.317008  | 5.502105  | 4.269501  |
| H | -5.971848  | 6.266976  | 2.338529  |
| H | -4.681713  | 6.263402  | -3.611214 |
| H | -6.312181  | 4.929216  | -4.201995 |
| H | -8.246524  | -1.231083 | -4.592778 |
| H | -6.638714  | -1.876187 | -5.910802 |
| H | -2.582530  | -5.443767 | 1.238389  |
| H | -0.699480  | -6.620094 | 1.133002  |
| H | -2.037712  | 0.239114  | 5.930746  |
| H | 0.043045   | 0.408456  | 6.656943  |

|   |           |           |           |
|---|-----------|-----------|-----------|
| H | 0.779838  | 6.917574  | 0.035856  |
| H | 1.277811  | 5.216074  | -1.268019 |
| H | 0.153817  | 2.640364  | -6.359848 |
| H | 1.296993  | 1.051700  | -5.371630 |
| H | 4.463061  | -6.712196 | -2.186484 |
| H | 5.875240  | -6.580188 | -0.518479 |
| H | 4.549708  | -3.009030 | 6.258005  |
| H | 6.640636  | -2.955367 | 5.644100  |
| H | 6.287912  | 4.513349  | 5.070953  |
| H | 5.917680  | 2.455888  | 5.736494  |
| H | 5.719949  | 5.821845  | -2.647401 |
| H | 7.498765  | 4.823802  | -1.857402 |
| H | 6.650697  | -1.932743 | -5.839228 |
| H | 6.536835  | 0.247475  | -5.627972 |
| H | 9.961434  | -0.736015 | -0.439925 |
| H | 10.167896 | 0.323730  | 1.471171  |
| H | -0.784582 | -5.014537 | -4.248634 |
| H | 0.295722  | -4.070174 | -5.905799 |

### 3

|    |           |          |           |
|----|-----------|----------|-----------|
| Ag | 0.169517  | 5.656046 | 0.245258  |
| Ag | -0.324210 | 3.970428 | -2.292903 |
| Ag | -2.380053 | 4.060431 | -0.158337 |
| Ag | 1.909938  | 4.080698 | 2.051863  |
| Ag | 2.394318  | 4.021548 | -0.883805 |
| Ag | 1.173175  | 1.469155 | -2.020143 |
| Ag | -1.896685 | 1.493158 | -1.513627 |
| Ag | -2.133470 | 1.503997 | 1.479205  |
| Ag | -1.046084 | 4.035063 | 2.544713  |
| Ag | 2.597457  | 1.507509 | 0.651702  |
| Ag | 0.000000  | 0.000000 | 0.241603  |
| Ag | 0.556102  | 1.524399 | 2.772101  |
| Ag | -1.702387 | 6.619882 | -1.849623 |
| Ag | 2.386053  | 3.762268 | -3.837060 |
| Ag | 4.234801  | 1.767572 | -1.878404 |
| Ag | -2.581699 | 6.569406 | 1.371091  |
| Ag | 0.139561  | 6.859198 | 3.028257  |
| Pt | 0.089336  | 2.816711 | 0.250543  |

|    |           |           |           |
|----|-----------|-----------|-----------|
| Ag | -0.169517 | -5.656046 | 0.245258  |
| Ag | 0.324210  | -3.970428 | -2.292903 |
| Ag | 2.380053  | -4.060431 | -0.158337 |
| Ag | -1.909938 | -4.080698 | 2.051863  |
| Ag | -2.394318 | -4.021548 | -0.883805 |
| Ag | -1.173175 | -1.469155 | -2.020143 |
| Ag | 1.896685  | -1.493158 | -1.513627 |
| Ag | 2.133470  | -1.503997 | 1.479205  |
| Ag | 1.046084  | -4.035063 | 2.544713  |
| Ag | -2.597457 | -1.507509 | 0.651702  |
| Ag | -0.556102 | -1.524399 | 2.772101  |
| Ag | 1.702387  | -6.619882 | -1.849623 |
| Ag | -2.386053 | -3.762268 | -3.837060 |
| Ag | -4.234801 | -1.767572 | -1.878404 |
| Ag | 2.581699  | -6.569406 | 1.371091  |
| Ag | -0.139561 | -6.859198 | 3.028257  |
| Pt | -0.089336 | -2.816711 | 0.250543  |
| S  | -2.827864 | 4.237875  | 4.386399  |
| S  | -2.299239 | 7.666752  | 3.733207  |
| S  | -4.699750 | 5.136107  | 0.548053  |
| S  | -3.906537 | 5.651691  | -2.849127 |
| S  | -2.218316 | 8.689905  | -0.230817 |
| S  | 1.114108  | 8.091274  | 0.924461  |
| S  | 0.316156  | 7.348893  | -3.344548 |
| S  | 0.056703  | 4.204250  | -4.915454 |
| S  | 1.188512  | 5.651152  | 5.023014  |
| S  | 3.952872  | 5.372007  | 2.883523  |
| S  | 5.668668  | 3.577010  | -0.691011 |
| S  | 3.616820  | 5.751345  | -2.537455 |
| S  | -1.663167 | 0.209046  | -4.019166 |
| S  | -4.291371 | -2.112851 | -4.552215 |
| S  | -4.604351 | 0.830875  | -1.608892 |
| S  | -4.320571 | 0.132027  | 1.851130  |
| S  | 1.704913  | 0.380028  | 4.756679  |
| S  | -1.704913 | -0.380028 | 4.756679  |
| S  | 2.827864  | -4.237875 | 4.386399  |
| S  | 2.299239  | -7.666752 | 3.733207  |
| S  | 4.699750  | -5.136107 | 0.548053  |

|   |           |           |           |
|---|-----------|-----------|-----------|
| S | 3.906537  | -5.651691 | -2.849127 |
| S | 2.218316  | -8.689905 | -0.230817 |
| S | -1.114108 | -8.091274 | 0.924461  |
| S | -0.316156 | -7.348893 | -3.344548 |
| S | -0.056703 | -4.204250 | -4.915454 |
| S | -1.188512 | -5.651152 | 5.023014  |
| S | -3.952872 | -5.372007 | 2.883523  |
| S | -5.668668 | -3.577010 | -0.691011 |
| S | -3.616820 | -5.751345 | -2.537455 |
| S | 1.663167  | -0.209046 | -4.019166 |
| S | 4.291371  | 2.112851  | -4.552215 |
| S | 4.604351  | -0.830875 | -1.608892 |
| S | 4.320571  | -0.132027 | 1.851130  |
| P | -2.637438 | 6.122188  | 5.033202  |
| P | -5.123183 | 5.942550  | -1.284646 |
| P | -0.367209 | 9.331252  | 0.301863  |
| P | 0.000000  | 6.249432  | -4.984635 |
| P | 3.179103  | 5.816226  | 4.682719  |
| P | 5.464735  | 5.015140  | -2.081740 |
| P | -3.384767 | -0.334196 | -4.931299 |
| P | -5.337032 | 0.924079  | 0.277550  |
| P | 0.000000  | 0.000000  | 5.768749  |
| P | 2.637438  | -6.122188 | 5.033202  |
| P | 5.123183  | -5.942550 | -1.284646 |
| P | 0.367209  | -9.331252 | 0.301863  |
| P | 0.000000  | -6.249432 | -4.984635 |
| P | -3.179103 | -5.816226 | 4.682719  |
| P | -5.464735 | -5.015140 | -2.081740 |
| P | 3.384767  | 0.334196  | -4.931299 |
| P | 5.337032  | -0.924079 | 0.277550  |
| H | -3.806865 | 6.465112  | 5.762322  |
| H | 3.806865  | -6.465112 | 5.762322  |
| H | -1.644485 | 6.224068  | 6.044416  |
| H | 1.644485  | -6.224068 | 6.044416  |
| H | -5.384287 | 7.325096  | -1.084217 |
| H | 5.384287  | -7.325096 | -1.084217 |
| H | -6.419526 | 5.476502  | -1.629496 |
| H | 6.419526  | -5.476502 | -1.629496 |



|   |           |            |           |
|---|-----------|------------|-----------|
| H | -0.544212 | 10.348729  | 1.275490  |
| H | 0.544212  | -10.348729 | 1.275490  |
| H | 0.157889  | 10.074523  | -0.786467 |
| H | -0.157889 | -10.074523 | -0.786467 |
| H | -1.244942 | 6.559547   | -5.594382 |
| H | 1.244942  | -6.559547  | -5.594382 |
| H | 0.907200  | 6.673751   | -5.991560 |
| H | -0.907200 | -6.673751  | -5.991560 |
| H | 3.624053  | 7.114826   | 5.057191  |
| H | -3.624053 | -7.114826  | 5.057191  |
| H | 3.799872  | 5.038252   | 5.697797  |
| H | -3.799872 | -5.038252  | 5.697797  |
| H | 6.256730  | 6.124766   | -1.685707 |
| H | -6.256730 | -6.124766  | -1.685707 |
| H | 6.112916  | 4.644671   | -3.292032 |
| H | -6.112916 | -4.644671  | -3.292032 |
| H | -4.366549 | 0.675975   | -4.752318 |
| H | 4.366549  | -0.675975  | -4.752318 |
| H | -3.157907 | -0.251474  | -6.330418 |
| H | 3.157907  | 0.251474   | -6.330418 |
| H | -5.612997 | 2.287696   | 0.564780  |
| H | 5.612997  | -2.287696  | 0.564780  |
| H | -6.630524 | 0.341911   | 0.277520  |
| H | 6.630524  | -0.341911  | 0.277520  |
| H | -0.270444 | 1.058362   | 6.678270  |
| H | 0.270444  | -1.058362  | 6.678270  |
